# Supplementary material for: Determining the pneumococcal conjugate vaccine coverage required for indirect protection against vaccine-type pneumococcal carriage in low and middle-income countries: a protocol for a prospective observational study
Source: PubMed Central journal article supplement (PMC5961565; doi:10.1136/bmjopen-2018-021512), 2018-05-18
Supplement: bmjopen-2018-021512.draft_revisions.pdf [file bmjopen-2018-021512.draft_revisions.pdf]

# BMJ Open

BMJ Open is committed to open peer review. As part of this commitment we make the peer review history of every article we publish publicly available.

When an article is published we post the peer reviewers' comments and the authors' responses online. We also post the versions of the paper that were used during peer review. These are the versions that the peer review comments apply to.

The versions of the paper that follow are the versions that were submitted during the peer review process. They are not the versions of record or the final published versions. They should not be cited or distributed as the published version of this manuscript.

BMJ Open is an open access journal and the full, final, typeset and author-corrected version of record of the manuscript is available on our site with no access controls, subscription charges or pay-per-view fees (<http://bmjopen.bmj.com>).

If you have any questions on BMJ Open's open peer review process please email [info.bmjopen@bmj.com](mailto:info.bmjopen@bmj.com)

# BMJ Open

## Determining the pneumococcal conjugate vaccine coverage required for indirect immunity in low- and middle-income countries: a protocol for a prospective observational study

|                               |                                                                                                                                                                                                                                                                                                                                                                                                                                                                                                                                                                                                                                                                                                                                                                                                                                                                                                                                                                                                                                                                                                                                                                                                                                                                                                                                                                                                                                                                                                                                                                                                                                                                                                                                                                                                                                                                                                                                                                                                                                                                                                                                                                                                                                                                                                                                                                                                                                                                                                                                                                                                                                                 |
|-------------------------------|-------------------------------------------------------------------------------------------------------------------------------------------------------------------------------------------------------------------------------------------------------------------------------------------------------------------------------------------------------------------------------------------------------------------------------------------------------------------------------------------------------------------------------------------------------------------------------------------------------------------------------------------------------------------------------------------------------------------------------------------------------------------------------------------------------------------------------------------------------------------------------------------------------------------------------------------------------------------------------------------------------------------------------------------------------------------------------------------------------------------------------------------------------------------------------------------------------------------------------------------------------------------------------------------------------------------------------------------------------------------------------------------------------------------------------------------------------------------------------------------------------------------------------------------------------------------------------------------------------------------------------------------------------------------------------------------------------------------------------------------------------------------------------------------------------------------------------------------------------------------------------------------------------------------------------------------------------------------------------------------------------------------------------------------------------------------------------------------------------------------------------------------------------------------------------------------------------------------------------------------------------------------------------------------------------------------------------------------------------------------------------------------------------------------------------------------------------------------------------------------------------------------------------------------------------------------------------------------------------------------------------------------------|
| Journal:                      | <i>BMJ Open</i>                                                                                                                                                                                                                                                                                                                                                                                                                                                                                                                                                                                                                                                                                                                                                                                                                                                                                                                                                                                                                                                                                                                                                                                                                                                                                                                                                                                                                                                                                                                                                                                                                                                                                                                                                                                                                                                                                                                                                                                                                                                                                                                                                                                                                                                                                                                                                                                                                                                                                                                                                                                                                                 |
| Manuscript ID                 | bmjopen-2018-021512                                                                                                                                                                                                                                                                                                                                                                                                                                                                                                                                                                                                                                                                                                                                                                                                                                                                                                                                                                                                                                                                                                                                                                                                                                                                                                                                                                                                                                                                                                                                                                                                                                                                                                                                                                                                                                                                                                                                                                                                                                                                                                                                                                                                                                                                                                                                                                                                                                                                                                                                                                                                                             |
| Article Type:                 | Protocol                                                                                                                                                                                                                                                                                                                                                                                                                                                                                                                                                                                                                                                                                                                                                                                                                                                                                                                                                                                                                                                                                                                                                                                                                                                                                                                                                                                                                                                                                                                                                                                                                                                                                                                                                                                                                                                                                                                                                                                                                                                                                                                                                                                                                                                                                                                                                                                                                                                                                                                                                                                                                                        |
| Date Submitted by the Author: | 09-Jan-2018                                                                                                                                                                                                                                                                                                                                                                                                                                                                                                                                                                                                                                                                                                                                                                                                                                                                                                                                                                                                                                                                                                                                                                                                                                                                                                                                                                                                                                                                                                                                                                                                                                                                                                                                                                                                                                                                                                                                                                                                                                                                                                                                                                                                                                                                                                                                                                                                                                                                                                                                                                                                                                     |
| Complete List of Authors:     | <p>Chan, Jocelyn; Murdoch Childrens Research Institute, Pneumococcal Research Group; The University of Melbourne, Department of Paediatrics<br/>         Nguyen, Cattram; Murdoch Childrens Research Institute, Pneumococcal Research; The University of Melbourne, Department of Paediatrics<br/>         Lai, Jana; Murdoch Childrens Research Institute, Pneumococcal Research Group<br/>         Dunne, Eileen; Murdoch Childrens Research Institute, Pneumococcal Research Group; The University of Melbourne, Department of Paediatrics<br/>         Andrews, Ross; Menzies School of Health Research, Charles Darwin University, Global &amp; Tropical Health Division; Australian National University, National Centre for Epidemiology &amp; Population Health<br/>         Blyth, Christopher C.; University of Western Australia, School of Medicine; Princess Margaret Hospital, Department of Infectious Diseases<br/>         Datta, Siddhartha; World Health Organization<br/>         Fox, Kim; World Health Organization, Regional Office for the Western Pacific<br/>         Ford, Rebecca ; Papua New Guinea Institute of Medical Research<br/>         Hinds, Jason; St George's- University of London, Institute for Infection and Immunity; London Bioscience Innovation Centre, BUGS Bioscience<br/>         La Vincente, Sophie; Murdoch Childrens Research Institute, Pneumococcal Research Group<br/>         Lehmann, Deborah; Telethon Kids Institute, University of Western Australia, Wesfarmers Centre for Vaccines and Infectious Diseases<br/>         Lim, Ruth; Murdoch Childrens Research Institute, Pneumococcal Research Group<br/>         Mungun, Tuya ; Ministry of Health, National Center of Communicable Diseases (NCCD)<br/>         Newton, Paul ; Lao-Oxford-Mahosot Hospital-Wellcome Trust Research Unit , Microbiology Laboratory, Mahosot Hospital; University of Oxford, Centre for Tropical Medicine and Global Health<br/>         Phetsouvanh, Rattanaphone; Lao-Oxford-Mahosot Hospital-Wellcome Trust Research Unit, Microbiology Laboratory, Mahosot Hospital; University of Oxford, Centre for Tropical Medicine and Global Health<br/>         Pomat, Willie; PNG Institute of Medical Research, Infection and Immunity; Telethon Kids Institute, University of Western Australia, Wesfarmers Centre for Vaccines and Infectious Diseases<br/>         Xeuatvongsa, Anonh; Ministry of Health, National Immunization Programme<br/>         von Mollendorf, Claire; Murdoch Childrens Research Institute, Pneumococcal Research Group; The University of Melbourne, Department</p> |

|           |                                                                                                                                                                                                                                                                                                                                                                                                                                                                                                                                                                                                                                                                                                                                                                                                                                          |
|-----------|------------------------------------------------------------------------------------------------------------------------------------------------------------------------------------------------------------------------------------------------------------------------------------------------------------------------------------------------------------------------------------------------------------------------------------------------------------------------------------------------------------------------------------------------------------------------------------------------------------------------------------------------------------------------------------------------------------------------------------------------------------------------------------------------------------------------------------------|
|           | <p>of Paediatrics<br/>Dance, David; Lao-Oxford-Mahosot Hospital-Wellcome Trust Research Unit, Microbiology Laboratory, Mahosot Hospital; London School of Hygiene and Tropical Medicine, Faculty of Infectious and Tropical Diseases<br/>Satzke, Catherine; Murdoch Childrens Research Institute, Pneumococcal Research; The University of Melbourne at the Peter Doherty Institute for Infection and Immunity, Department of Microbiology and Immunology<br/>Muholland , Kim; Murdoch Childrens Research Institute, Pneumococcal Research Group; London School of Hygiene and Tropical Medicine, Department of Infectious Disease Epidemiology<br/>Russell, F. M.; Murdoch Childrens Research Institute, Pneumococcal Research Group; The University of Melbourne, Centre for International Child Health, Department of Paediatrics</p> |
| Keywords: | Public health < INFECTIOUS DISEASES, Paediatric infectious disease & immunisation < PAEDIATRICS, Respiratory infections < THORACIC MEDICINE                                                                                                                                                                                                                                                                                                                                                                                                                                                                                                                                                                                                                                                                                              |
|           |                                                                                                                                                                                                                                                                                                                                                                                                                                                                                                                                                                                                                                                                                                                                                                                                                                          |

SCHOLARONE™  
Manuscripts

peer review only

1  
2  
3  
4 **DETERMINING THE PNEUMOCOCCAL CONJUGATE VACCINE COVERAGE REQUIRED FOR**  
5 **INDIRECT IMMUNITY IN LOW- AND MIDDLE-INCOME COUNTRIES: A PROTOCOL FOR A**  
6 **PROSPECTIVE OBSERVATIONAL STUDY**  
7

8 **Authors:**

9  
10 Chan J<sup>1,2</sup>, Nguyen CD<sup>1,2</sup>, Lai JYR<sup>1</sup>, Dunne EM<sup>1,2</sup>, Andrews R<sup>3,4</sup>, Blyth CC<sup>5,6</sup>, Datta S<sup>7</sup>, Fox K<sup>8</sup>, Ford  
11 R<sup>9</sup>, Hinds J<sup>10,11</sup>, La Vincente S<sup>1</sup>, Lehmann D<sup>12</sup>, Lim R<sup>1</sup>, Mungun T<sup>13</sup>, Newton PN<sup>14,15</sup>, Phetsouvanh  
12 R<sup>14,15\*</sup>, Pomat W<sup>9,12</sup>, Xeuatvongsa A<sup>16</sup>, von Mollendorf C<sup>1,2</sup>, Dance DAB<sup>14,17</sup>, Satzke C<sup>1,18</sup>, Mulholland  
13 K<sup>1,19</sup>, Russell FM<sup>1,20</sup> for the PneuCAPTIVE Protocol Group  
14  
15

- 16 1. Pneumococcal Research Group, Murdoch Children's Research Institute, Melbourne,  
17 Australia.
- 18 2. Department of Paediatrics, The University of Melbourne, Melbourne, Australia.
- 19 3. Global & Tropical Health Division, Menzies School of Health Research, Charles Darwin  
20 University, Darwin, Australia.
- 21 4. National Centre for Epidemiology & Population Health, Australian National University,  
22 Canberra, Australia
- 23 5. University of Western Australia, School of Medicine, Perth, Australia;
- 24 6. Department of Infectious Diseases, Princess Margaret Hospital, Perth, Australia;
- 25 7. World Health Organization, Vientiane, Lao People's Democratic Republic
- 26 8. Regional Office for the Western Pacific, World Health Organization, Manila, Philippines.
- 27 9. Papua New Guinea Institute of Medical Research, Infection and Immunity Unit, Goroka,  
28 Papua New Guinea.
- 29 10. Institute for Infection and Immunity, St George's- University of London, London, United  
30 Kingdom.
- 31 11. BUGS Bioscience, London Bioscience Innovation Centre, London, United Kingdom.
- 32 12. Wesfarmers Centre for Vaccines and Infectious Diseases, Telethon Kids Institute, University  
33 of Western Australia, Perth, Australia.
- 34 13. National Center of Communicable Diseases (NCCD), Ministry of Health, Ulaanbaatar,  
35 Mongolia.
- 36 14. Lao-Oxford-Mahosot Hospital-Wellcome Trust Research Unit (LOMHWRU), Microbiology  
37 Laboratory, Mahosot Hospital, Vientiane, Lao PDR.
- 38 15. Centre for Tropical Medicine and Global Health, University of Oxford, Oxford, United  
39 Kingdom.
- 40 16. National Immunization Programme, Ministry of Health, Vientiane, Lao PDR.
- 41 17. Faculty of Infectious and Tropical Diseases, London School of Hygiene and Tropical  
42 Medicine, London, United Kingdom
- 43 18. Department of Microbiology and Immunology, The University of Melbourne at the Peter  
44 Doherty Institute for Infection and Immunity, Melbourne, Australia
- 45  
46  
47  
48  
49  
50  
51  
52  
53  
54  
55  
56  
57  
58  
59  
60

1  
2  
3 19. Department of Infectious Disease Epidemiology, London School of Hygiene and Tropical  
4 Medicine, London, United Kingdom.

5 20. Centre for International Child Health, Department of Paediatrics, The University of Melbourne,  
6 Melbourne, Australia.  
7

8  
9 \*Deceased  
10

11  
12  
13 Corresponding author: Jocelyn Chan  
14

15 Pneumococcal Research Group,  
16 Murdoch Children's Research Institute  
17 50 Flemington Road, Parkville 3052 VIC  
18 Australia  
19  
20

21  
22 Email: [jocelyn.chan@mcri.edu.au](mailto:jocelyn.chan@mcri.edu.au)  
23

24 Telephone: +61 3 9345 4968  
25  
26  
27  
28  
29  
30  
31  
32  
33  
34  
35  
36  
37  
38  
39  
40  
41  
42  
43  
44  
45  
46  
47  
48  
49  
50  
51  
52  
53  
54  
55  
56  
57  
58  
59  
60

## ABSTRACT

### Introduction

Pneumococcal conjugate vaccines (PCVs) prevent disease through both direct protection of vaccinated individuals, and indirect protection of unvaccinated individuals by reducing nasopharyngeal (NP) carriage and transmission of vaccine-type pneumococci. While the indirect effects of PCV vaccination are well described, the PCV coverage required to achieve the indirect effects is unknown. We will investigate this using hospital-based NP pneumococcal carriage surveillance at three sites in the Asia-Pacific region.

### Methods and analysis

We are recruiting children aged 2-59 months admitted to participating hospitals with acute respiratory infection in Lao People's Democratic Republic, Mongolia and Papua New Guinea. Thirteen-valent PCV (PCV13) status is obtained from written records. NP swabs are collected according to standard methods, screened using *lytA* qPCR and serotyped by microarray. Village-level vaccination coverage, for the resident communities of the recruited cases, is determined using administrative data or community survey. Our analysis will investigate the relationship between prevalence of PCV13 carriage among under-vaccinated cases (indirect effects) and vaccine coverage using generalised estimating equations.

### Ethics and dissemination

Ethical approval has been obtained from the relevant ethics committees at participating sites. The results are intended for publication in open-access peer-reviewed journals and will demonstrate methods suitable for low- and middle-income countries to monitor vaccine impact, and inform vaccine policy makers about the PCV coverage required to maximise the effects of PCV.

### STRENGTHS AND LIMITATIONS

- This protocol describes a method for monitoring the indirect effects of pneumococcal conjugate vaccines (PVCs) on pneumococcal carriage in low- and middle-income countries, in the absence of baseline pre-PCV data
- The use of molecular serotyping microarray enables detection of multiple serotype carriage and serotype-specific carriage density
- The inclusion of three sites, which have contrasting vaccine schedules and pneumococcal epidemiology, will enable us to explore factors which may modify the vaccine coverage required to achieve indirect effects however variations in methods and settings may impact on the comparability of our results across the three sites

## INTRODUCTION

Infections due to *Streptococcus pneumoniae* (the pneumococcus), including pneumonia, meningitis and septicaemia, are a leading cause of morbidity and mortality among children and elderly, especially in low- and middle-income countries.<sup>1</sup> The main reservoir for the pneumococcus is the human nasopharynx. Pneumococcal carriage peaks in young children, an important group for transmission of pneumococci to older age groups,<sup>2,3</sup> and is a precursor for disease.<sup>4</sup> There are over 90 known serotypes of pneumococci, with differing capacities for causing disease.<sup>5</sup>

The introduction of the pneumococcal conjugate vaccine (PCV) has resulted in substantial reductions in pneumococcal disease in many settings.<sup>6</sup> These reductions are mediated by direct effects on vaccinated children as well as indirect effects on under-vaccinated children and adults through a reduction in transmission and subsequent nasopharyngeal (NP) carriage of pneumococcal serotypes included in the vaccine.<sup>7-10</sup> The indirect effects account for a substantial component of the overall vaccine effect. Following the introduction of the 7-valent PCV (PCV7) into the routine vaccination program in the USA, twice as many invasive cases were prevented through indirect effects compared to direct effects.<sup>11</sup>

The magnitude of indirect effects following introduction of PCV varies considerably by setting. Reductions in invasive pneumococcal disease (IPD) among adults ranged from 8.8% among adults in Denmark three years after PCV implementation, to 70% reduction among adults in Taiwan, seven years after PCV implementation.<sup>12</sup> A review of the literature found that higher rates of coverage, higher baseline rates of pneumococcal disease and greater time elapsed since PCV introduction were all associated with greater degrees of indirect effects.<sup>12</sup> However, the majority of these studies were conducted in high-income country settings using a similar vaccine schedule, with relatively high levels of vaccine coverage.

The threshold of vaccination coverage required to achieve significant indirect PCV effects is not well understood. Studies of NP carriage indicate that there is variability in the coverage required to achieve significant indirect effects. Two studies in the US examined this question for the 13-valent PCV (PCV13) that superseded 7-valent (PCV7) immunisation. A vaccine coverage of 58% among American Indian children in south-western USA and 75% coverage among children in Massachusetts resulted in a 50% decline in the prevalence of carriage of six PCV13 serotypes (i.e. PCV13 types not included in PCV7) carried by under-vaccinated children.<sup>13,14</sup> The US uses a 3+1 schedule (three primary doses with a booster) and had a catch-up program up to five years of age. Many low- and middle-income countries utilise a 3+0 schedule.<sup>15</sup> More data are needed from a range of low- and middle-income countries to determine the vaccination coverage required to maximise the indirect effects of PCVs, and to determine factors which may modify the vaccine coverage required for indirect effects, such as baseline carriage prevalence, indicating intensity of transmission, vaccine schedules and use of catch-up campaigns.

Existing systematic reviews indicate that vaccine schedules do not impact on the degree of indirect effects on IPD, however the studies included in these reviews predominantly use a 3+1 schedule or a

1  
2  
3 2+1 schedule (two primary doses with a booster) and have limited studies using PCV13.<sup>12 16</sup> Few  
4 studies using the 3+0 schedule (three primary doses with no booster) are available in the published  
5 literature, despite the 3+0 schedule being widely used, especially in low- and middle-income  
6 countries.  
7

8  
9 Despite the gradual introduction of PCVs in low- and middle-income countries over the last decade,  
10 there have been few studies published on the impacts of PCV in these settings.<sup>17 18</sup> This is because  
11 the predominant method for assessing vaccine impact, IPD surveillance, is costly and resource-  
12 intensive to establish – requiring laboratory capacity as well as the collection of large numbers of  
13 samples, obtained using aseptic techniques, in order to detect a relatively rare outcome.<sup>19</sup>  
14 Furthermore, baseline data prior to vaccine introduction required for impact evaluations are often not  
15 available in these settings.  
16  
17

18  
19 In the absence of IPD surveillance, low- and middle-income countries require a method to evaluate  
20 direct and indirect vaccine effects. We propose using NP carriage surveillance in children hospitalised  
21 with acute respiratory infection to monitor the indirect effects of PCV13 as part of the PneuCAPTIVE  
22 study (PNEUmococcal CArriage in Pneumonia To Investigate Vaccine Effects).  
23

24  
25 In this context, we refer to “carriage” as the detection of pneumococci in the nasopharynx of a child  
26 with acute respiratory infection. A reduction in vaccine-type (VT) pneumococcal carriage will likely  
27 reflect reductions in disease due to VT pneumococci, since carriage is a precursor to disease.<sup>4</sup>  
28 Existing studies among healthy children have demonstrated reductions in VT carriage following PCV  
29 introduction, while overall carriage remains stable due to replacement with non-vaccine type (NVT)  
30 carriage.<sup>20 21</sup>  
31  
32

33  
34 We aim to determine the PCV13 coverage required to demonstrate substantial indirect effects of PCV  
35 using NP carriage surveillance in children hospitalised with acute respiratory infection (ARI) in three  
36 settings within the Asia-Pacific region. We are focussing on children under five years of age because  
37 studies have shown that children are the main reservoir for pneumococci, and reductions in  
38 transmission within this age group are likely to result in reductions in VT carriage among older age  
39 groups.<sup>2 3 22</sup>  
40  
41

42  
43 As this is a novel method for determining indirect effects, we will also aim to determine whether  
44 changes in patterns of VT and NVT pneumococcal carriage among children with ARI are reflective of  
45 changes in serotypes circulating in the community, noting that carriage in our cohort may be more  
46 reflective of serotypes causing disease.<sup>5 23</sup>  
47  
48

## 49 **OBJECTIVES**

50 Our objectives are to: (1) investigate the relationship between PCV13 coverage and VT carriage  
51 among under-vaccinated children (indirect effects) aged 2-59 months with an ARI in Lao People's  
52 Democratic Republic (Lao PDR), Mongolia and Papua New Guinea (PNG); (2) describe monthly  
53 trends in VT carriage prevalence among cases and contacts; (3) investigate the relationship between  
54 PCV13 coverage and VT carriage among under-vaccinated children (indirect effects) living in the  
55  
56  
57  
58  
59  
60



community; and (4) compare the PCV13 coverage required to demonstrate indirect effects of PCV13 by site and determine the degree to which site-specific factors, such as baseline pneumococcal carriage rates and densities, vaccine schedule and use of catch-up campaigns, account for differences in the PCV13 coverage required to demonstrate indirect effects.

## METHODS

### Study design

We are conducting prospective hospital-based observational studies in Lao PDR, Mongolia and PNG. We are recruiting children 2-59 months of age presenting with ARI and obtaining NP swabs to determine prevalence and density of VT carriage. We are determining the PCV13 status of each case using written record. Recruitment will occur over at least three years post-PCV13 introduction at each site.

Concurrently, we are determining vaccination coverage at the resident village or subdistrict of each recruited case, using either administrative data or vaccination coverage surveys.

### Study settings

#### Lao PDR site

The Lao PDR PneuCAPTIVE study is embedded within a hospital-based study of ARI aetiology, in collaboration with Lao Oxford Mahosot Hospital-Wellcome Trust Research Unit (LOMWRU), the World Health Organization (WHO) and the Lao PDR Ministry of Health<sup>24</sup>. PCV13 was introduced in October 2013, using a 3+0 schedule at 6, 10 and 14 weeks of age and a catch-up program up to 12 months of age (The PNG PneuCAPTIVE study represents a collaboration between the PNG Institute of Medical Research (IMR), Telethon Kids Institute, the University of Western Australia and MCRI. It is an extension of a pneumonia aetiology study that commenced in 2013<sup>25</sup>. PCV13 was introduced to PNG in October 2014 using a 3+0 schedule at 1, 2 and 3 months of age (Table 1), however was not widely distributed in the Eastern Highlands Province until late 2015. We are recruiting cases at the Eastern Highlands Provincial Hospital, the major referral hospital for the Eastern Highland Province, as well as nearby clinics in Goroka, the capital of the Eastern Highlands Province. In PNG, we are also recruiting caregivers, as well as community contacts, defined as children 0-59 months of age, who have slept in the same house as or played with the case during the preceding three weeks. This will enable us to determine whether changes in patterns of VT pneumococcal carriage in the hospitalised cases are reflective of changes within the community, as well as to examine indirect effects in the adult age group.

Table 1). We will recruit cases at Mahosot Hospital, one of the largest paediatric referral hospitals in Vientiane, the capital of Lao PDR.

#### Mongolia site

The Mongolian PneuCAPTIVE study is embedded within a hospital-based vaccine impact evaluation, which is conducted in partnership between Murdoch Children's Research Institute (MCRI), WHO and the Mongolian Ministry of Health. PCV13 was introduced in June 2016, using a modified 2+1 schedule at 2, 4 and 9 months of age, within the two 'Phase 1' districts within Ulaanbaatar, the capital of

Mongolia as part of a phased introduction (Table 1), with a catch-up program of two doses one month apart for those up to 24 months of age. We are recruiting cases, residing in the two phase 1 districts, at the two district hospitals and the tertiary referral paediatric hospital for Mongolia, the Maternal and Child Hospital (MCH).

#### PNG site

The PNG PneuCAPTIVE study represents a collaboration between the PNG Institute of Medical Research (IMR), Telethon Kids Institute, the University of Western Australia and MCRI. It is an extension of a pneumonia aetiology study that commenced in 2013<sup>25</sup>. PCV13 was introduced to PNG in October 2014 using a 3+0 schedule at 1, 2 and 3 months of age (Table 1), however was not widely distributed in the Eastern Highlands Province until late 2015. We are recruiting cases at the Eastern Highlands Provincial Hospital, the major referral hospital for the Eastern Highland Province, as well as nearby clinics in Goroka, the capital of the Eastern Highlands Province. In PNG, we are also recruiting caregivers, as well as community contacts, defined as children 0-59 months of age, who have slept in the same house as or played with the case during the preceding three weeks. This will enable us to determine whether changes in patterns of VT pneumococcal carriage in the hospitalised cases are reflective of changes within the community, as well as to examine indirect effects in the adult age group.

Table 1: Key aspects of the 13-valent pneumococcal conjugate vaccination (PCV13) program by site, Lao People's Democratic Republic (PDR), Mongolia and Papua New Guinea (PNG)

|                                | Lao PDR                                        | Mongolia                                                      | PNG                     |
|--------------------------------|------------------------------------------------|---------------------------------------------------------------|-------------------------|
| Year of PCV13 introduction     | Oct 2013                                       | Jun 2016                                                      | Oct 2014                |
| Location of PCV13 introduction | National                                       | Two districts in Ulaanbaatar                                  | National                |
| PCV13 schedule                 | 3+0 (6,10 and 14 weeks)                        | 2+1 (2,4, and 9 months)                                       | 3+0 (1, 2 and 3 months) |
| Presence of a catch-up program | Catch-up of three doses up to 12 months of age | Catch-up of two doses two months apart up to 24 months of age | None                    |

#### Case recruitment and data collection

Participant recruitment and data collection are consistent across the three sites; however there are some local adaptations to the protocol at each site which are summarised in Table 2. These adaptations are due to the PneuCAPTIVE study being nested within other existing studies, described above.

Cases are eligible for inclusion in the PneuCAPTIVE study if they are 2-59 months of age, and presenting with ARI (defined in Table 2 below). All cases with fever or respiratory symptoms are screened for inclusion. In Mongolia, we are restricting recruitment to patients living within the two

'Phase 1' districts which have commenced PCV13 in 2016. In PNG, we are restricting recruitment to patients living within one hour of the town as follow-up is logistically challenging.

Regarding recruitment, in Lao PDR, study staff are screening potential recruits from Monday to Friday each week. However, they are obtaining clinical information from medical records for all eligible cases, including those admitted at weekends to ensure we have a representative sample. In Mongolia, caregivers of all eligible children presenting to the hospital will be approached for recruitment as part of the larger PCV impact study. However, for the purposes of this study we will select a random sample of 33 cases per month for microbiological testing. In PNG recruitment takes place 4-5 days per week.

Table 2: Patient eligibility by site, Lao People's Democratic Republic (PDR), Mongolia and Papua New Guinea (PNG)

| Site                      | Lao PDR                                                                                             | Mongolia                                                                      | PNG                                                            |
|---------------------------|-----------------------------------------------------------------------------------------------------|-------------------------------------------------------------------------------|----------------------------------------------------------------|
| <b>Inclusion criteria</b> | 2-59 months of age and presenting with:                                                             |                                                                               |                                                                |
|                           | Fever (history or measured) AND one of cough OR dyspnoea OR rhinitis OR abnormal chest auscultation | Cough OR dyspnoea AND tachypnoea* OR hypoxia OR chest indrawing               | Cough AND tachypnoea* AND lower chest wall indrawing           |
| <b>Exclusion criteria</b> | -                                                                                                   | Lives outside Phase 1 district<br>Admitted with pneumonia in the last 14 days | Lives ≥ 1 hour outside town OR hospitalisation in past 14 days |
| <b>Recruitment site</b>   | Inpatient setting only                                                                              | Inpatient setting only                                                        | Inpatient and outpatient setting                               |
| <b>Sampling</b>           | Monday-Friday                                                                                       | Random (33 per month)                                                         | Convenience (Monday-Friday)                                    |

\* Tachypnoea is defined as greater than or equal to 50 breaths per minute

After determining eligibility and obtaining informed parental consent, we complete a questionnaire to obtain: demographic data, clinical data, PCV13 status, and risk factors for vaccination and NP carriage, including prior antibiotic use (see analysis section below for complete list). Vaccination status is determined using written records – either parent-held immunisation records or health centre administrative records.

We then collect an NP swab according to WHO guidelines and store it in 1 ml skim milk tryptone glucose glycerol (STGG) medium.<sup>26</sup> Swabs are vortexed, aliquoted, and stored frozen at -80°C within 8 hours of collection, and transported to the Pneumococcal Research laboratory at MCRl on dry ice or in liquid nitrogen, where they will be stored at -80°C.

### Laboratory methods

All samples are screened for the presence of pneumococci using real-time quantitative PCR (qPCR) assay targeting the pneumococcal *lytA* gene.<sup>27</sup> Genomic DNA are extracted from 100 µl of STGG using a MagNA Pure LC Machine (Roche) using the DNA Isolation Kit III (Bacteria, Fungi) (Roche) the following an enzymatic lysis treatment. The pneumococcal load is estimated by reference to a standard curve.

All swabs that are *lytA* positive or equivocal are molecular serotyped using BµG@S Senti-SP v1.5 microarray (BUGS Bioscience) as previously described.<sup>28</sup>

Serotype-specific pneumococcal density is calculated using the relative abundance of each serotype identified, as determined using microarray and interpreted with the assistance of a Bayesian random effects model as previously described,<sup>28 29</sup> and the overall pneumococcal load as determined by the *lytA* qPCR.

### Key definitions

The primary outcome, VT carriage, is defined as the NP carriage of at least one pneumococcal serotype included in the PCV13 vaccine, i.e. serotypes 1, 3, 4, 5, 6A, 6B, 7F, 9V, 14, 18C, 19A, 19F, and 23F. A secondary outcome is VT carriage density (CFU/mL) which is defined as an aggregate of the serotype-specific density for each of the VTs carried by the case, and will be reported as a continuous variable using a log scale to account for large variations in density and a skewed distribution.

A case will be defined as 'vaccinated' if they have documented evidence of receiving an adequate number of PCV doses to provide a protective immune response against vaccine serotypes at least 14 days prior to study enrolment.<sup>30</sup> For children < 12 months of age, an adequate number of PCV doses is defined as two or more PCV13 doses. For children 12 months of age or older, an adequate number of doses is defined as receipt of 2 doses in the first year of life or at least 1 dose after the age of 12 months. Conversely, a case will be defined as 'under-vaccinated' if they have received less than the adequate number of PCV doses. Sensitivity analyses will be conducted using varying definitions of vaccinated including receiving at least one dose of vaccine at any age.

### Vaccine coverage data collection

For each under-vaccinated case recruited, we are determining their resident village or subdistrict vaccination coverage. In Mongolia and Lao PDR, we are using administrative data, whereas in PNG, we are conducting community surveys within 10 days of discharge in the village where the case is living (Table 3). In Mongolia, we have validated the newly introduced electronic immunisation record against clinic health records, finding a high degree of concordance.<sup>31</sup> We are also in the process of validating the population registers at health centres in Mongolia.

Table 3: Vaccination coverage data by site, Lao People's Democratic Republic (PDR), Mongolia and Papua New Guinea

| Site | Lao PDR | Mongolia | Papua New Guinea |
|------|---------|----------|------------------|
|------|---------|----------|------------------|

|                                   |                                            |                                    |                   |
|-----------------------------------|--------------------------------------------|------------------------------------|-------------------|
| <b>Source of numerator data</b>   | Health centre records                      | Electronic immunisation record     | Community surveys |
| <b>Source of denominator data</b> | Lao PDR Population and Housing Census 2015 | Health centre population register* |                   |

\* All children are required to be registered at the health centre servicing their resident subdistrict in order to receive health services.

### Data management

In Lao PDR and Mongolia, study staff are double-entering data using a RedCAP (Research Electronic Data Capture) and Microsoft Access (Microsoft Corporation) database, respectively. In PNG, data are checked by a monitor prior to being entered into Filemaker Pro (FileMaker Inc.). We are conducting regular double-entry discrepancy checks and logic checks using Stata Statistical Software (College Station, TX: StataCorp LLC).

### Analysis

All analyses will be completed using Stata Statistical Software (College Station, TX: StataCorp LLC). We will summarise continuous variables using mean and standard deviation (or median and interquartile range for non-symmetrical data). Categorical variables will be summarised using frequency counts and percentages.

#### Objective 1: Relationship between vaccine coverage and indirect effects

We want to investigate the relationship between prevalence and density of VT carriage among under-vaccinated cases (indirect effects) and subdistrict/village PCV coverage. We will use an adaptation of a method used to estimate indirect protection for an oral cholera vaccine which exploits heterogeneities in vaccine coverage at the subdistrict/village level, comparing prevalence and density of VT carriage among under-vaccinated children from subdistricts/villages with differing levels of vaccine coverage.<sup>32 33</sup>

This will be done using multivariable models with VT carriage prevalence or density in ARI cases as the outcome variable and PCV coverage at the child's place of residence at the time of admission as the exposure variable. We will use generalised estimating equations to account for clustering at the subdistrict/village level.

To identify confounders for adjustment, we will construct directed acyclic graphs (DAG). DAGs include all variables potentially related to exposure and outcome, connected using uni-directional arrows showing causal relationships between variables. The graph identifies potentially confounding pathways and allows investigators to determine variables that should be controlled for to obtain unbiased effect estimates. As there are likely to be unique confounders between sites, we will develop site-specific DAGs. We will use DAGitty.net (version 2.3) software to identify minimally sufficient confounding subsets for adjustment.

1  
2  
3 For each site, we will construct a similar model using overall pneumococcal carriage as the  
4 dependent variable. This model will act as a bias indicator since PCV coverage is not expected to  
5 affect levels of overall pneumococcal carriage due to replacement carriage with non-VTs (NVTs),  
6 although complete replacement to baseline levels can take several years.<sup>20 34 35</sup> Therefore, we will  
7 restrict this analysis to the latter part of the study period, when descriptive analyses indicate the  
8 replacement is complete.  
9  
10

11 Objective 2: VT carriage prevalence among cases and contacts, by calendar month (PNG only)  
12 Crude and adjusted monthly VT carriage prevalence will be estimated within rolling seven-month  
13 intervals. This will be done separately for cases and contacts. To account for differences in age  
14 between cases and community contacts, the carriage prevalence will be adjusted using direct  
15 standardisation (standardised to the case population over the entire study period). We are using  
16 rolling seven-month intervals to present smooth curves, and to assess trends over time.  
17  
18  
19

20 Objective 3: Relationship between vaccine coverage and indirect effects among community contacts  
21 (PNG only)  
22

23 To investigate whether relationship between vaccine coverage and indirect effects as observed  
24 among cases with ARI are reflective of the relationship between vaccine coverage and indirect effects  
25 in the wider community, we will apply the same model described above to under-vaccinated  
26 community contacts. We will construct multivariable models with VT carriage prevalence or density  
27 among under-vaccinated community contacts as the outcome variable and PCV coverage at the  
28 child's place of residence at the time of admission as the exposure variable. We will be using the  
29 same vaccine coverage data as for the cases.  
30  
31  
32

33 Objective 4: Comparison of vaccine coverage required for indirect effects across sites

34 We will compare differences in the PCV13 coverage required to demonstrate indirect effects of  
35 PCV13 qualitatively, by site and in relation to vaccine schedule and use of catch-up campaigns.  
36 Inferential statistics are unlikely to be suitable with the inclusion of only three sites and comparability  
37 between sites is limited due to variations between them.  
38  
39  
40

#### 41 **Power calculation**

42 Power calculations were performed using nQuery Advisor + nTerim 4.0. Calculations were based on  
43 sample size methods for logistic regression models with a continuous covariate (i.e. PCV coverage)  
44 and additional covariates, with inflation to account for clustering within villages. Power calculations  
45 assumed VT carriage prevalence of 20% in Lao PDR and Mongolia, and 40% in PNG at the mean  
46 PCV coverage level,<sup>36</sup> and VT carriage prevalence of 10% in Lao PDR and Mongolia and 30% in  
47 PNG at one standard deviation above the mean PCV coverage level. Assuming a significance level of  
48 0.05, allowing for adjustment using multiple covariates with an r-squared of 0.4, and that 50% of the  
49 cases are under-vaccinated, a sample size of 1200 cases per site would provide between 99% power  
50 to determine the proportion of cases carrying VT pneumococcus at varying levels of village vaccine  
51 coverage. The power calculation has been adjusted to account for clustering by village, with higher  
52  
53  
54  
55  
56  
57  
58  
59  
60

variability in Lao PDR and PNG (intraclass coefficient [ICC] 0.1) and lower variability in Mongolia (ICC 0.01).

### Missing data

We will describe the number of participants with missing data on individual variables and compare the characteristics of those with and without missing data to determine whether there is evidence of systematic differences in characteristics. If there is evidence of systematic differences between those with and without missing data, we will consider using multiple imputation to predict the distribution of the missing data in order to account for the bias due to incomplete data.<sup>37</sup>

### CURRENT STATUS OF THE STUDY

Recruitment is ongoing and analysis of data, followed by publication of results, is expected from 2018 onwards. As of August 2017, we have recruited 1039, 481 and 3847 cases from Lao PDR, PNG and Mongolia respectively. Table 4 describes the baseline characteristics of the children recruited.

Table 4: Case characteristics by site, Lao People's Democratic Republic (PDR), Mongolia and Papua New Guinea (PNG), 2014-2017

|                     |              | Lao PDR<br>n=1039<br>n (%) | Mongolia<br>n=3847<br>n (%) | PNG<br>n=481<br>n (%) |
|---------------------|--------------|----------------------------|-----------------------------|-----------------------|
| Year of recruitment | 2014         | 365/1039 (35)              | NA                          | NA                    |
|                     | 2015         | 323/1039 (31)              | 885/3847 (23)               | NA                    |
|                     | 2016         | 281/1039 (27)              | 2007/3847 (52)              | 190/481 (40)          |
|                     | 2017         | 70/1039 (7)                | 955/3847 (25)               | 291/481 (60)          |
| Age group           | < 12 months  | 432/1038 (42)              | 1481/3847 (39)              | 258/481 (54)          |
|                     | 12-23 months | 346/1038 (33)              | 1250/3847 (32)              | 123/481 (25)          |
|                     | >=24 months  | 260/1038 (25)              | 1116/3847 (29)              | 100/481 (21)          |
| Gender              | Male         | 591/1039 (57)              | 2079/3847 (54)              | 278/481 (58)          |

### ETHICS AND DISSEMINATION

Prospective participants will be fully informed about the potential risks and benefits of participation and written informed consent will be obtained prior to recruitment. The study is being conducted according to protocols approved by the following ethics committees: Lao PDR Ministry of Health National Ethics Committee for Health Research (057/2013 NECHR), Oxford Tropical Research Ethics Committee (1050-13), Mongolian National Ethics Committee for Health Research, the WHO Regional Office for the Western Pacific (WPRO) Ethics Review Committee (2013.30.LAO.2.EPI, Mongolia), PNG IMR Institutional Review Board (1510), Government of PNG Medical Research Advisory

1  
2  
3 Committee (15.18), and the Royal Children's Hospital/MCRI Human Research Ethics Committee  
4 (33177B, 33203E).  
5

6 We plan on disseminating results to relevant stakeholders within Lao PDR, PNG and Mongolia, as  
7 well as submitting our findings for publication in relevant peer-reviewed journals and conferences.  
8  
9

## 10 **DISCUSSION**

11 The ability for low- and middle-income countries to monitor the indirect effects of PCV is critical.  
12 Maximising indirect effects is important because these effects comprise a substantial proportion of  
13 overall PCV impact and increase the cost-effectiveness of the vaccine.<sup>38</sup> Indirect protection is  
14 particularly important for individuals who are unable to be vaccinated or who have poor vaccine  
15 responses, such as infants too young to be vaccinated and the elderly. In addition, the Bill & Melinda  
16 Gates Foundation are supporting studies looking into the effectiveness of reduced dose schedules  
17 (1+1). This reduced dose schedule needs to maintain indirect effects following PCV introduction and  
18 this surveillance method provides a mechanism to determine when herd immunity has been achieved  
19 and whether it is maintained.<sup>39</sup> Furthermore, the ability to determine whether substantial herd  
20 immunity has been achieved may help to identify settings which are appropriate for introduction of  
21 reduced dose or modified schedules.  
22  
23  
24  
25

26 The results of our study will address the scarcity of literature determining the PCV coverage required  
27 to achieve substantial indirect effects, especially in low- and middle-income countries. The inclusion of  
28 three sites, which have contrasting vaccine schedules, baseline intensities of pneumococcal carriage  
29 and health-care systems, will also enable us to determine whether this vaccine coverage threshold  
30 differs by site and explore factors which may modify the vaccine coverage required to achieve indirect  
31 effects.  
32  
33  
34

35 In this proposal, we describe a novel surveillance method to measure indirect effects. Although the  
36 isolation of a particular pneumococcal serotype from the nasopharynx of a child with ARI is not  
37 necessarily indicative of the serotype causing pneumococcal disease, reduced detection of VT  
38 pneumococci is likely to reflect reductions in disease due to VT pneumococci. Furthermore, our  
39 proposed analysis methods enable estimation of indirect effects in the absence of baseline pre-PCV  
40 data. This will be relevant for many low- and middle-income countries that have little or no baseline  
41 data and are considering options for surveillance to accompany the introduction of PCV.  
42  
43  
44

45 Another key strength of our methods is the use of consistent molecular serotyping microarray  
46 methods across all three sites, enabling sensitive detection of multiple serotype carriage and  
47 ascertainment of serotype-specific density.<sup>28</sup> Conventional pneumococcal carriage studies typically  
48 detect the presence of a single serotype and may overlook the presence of vaccine serotypes  
49 occurring at lower densities. The results of this study will also add to the limited literature on the effects  
50 of PCV on vaccine-type carriage density, which may affect likelihood of transmission.<sup>40</sup>  
51  
52  
53

54 Our proposed methods have several potential limitations. Firstly, there are significant challenges in  
55 determining accurate estimates of PCV coverage in resource-limited settings. In Mongolia and Lao  
56  
57  
58  
59  
60



1  
2  
3 PDR, where we are using administrative data, our estimates rely on the availability of accurate data  
4 about vaccine doses administered (numerator) as well as population estimates for the target age  
5 group (denominator). In both settings, we are conducting audits to assess the reliability of numerator  
6 data. Regarding denominator data, we are fortunate that a recent population census was conducted  
7 in Lao PDR in March 2015. However, we will be auditing denominator data in Mongolia, where  
8 population estimates are affected by large seasonal population movements between rural and urban  
9 settings. In PNG, the validity of the community surveys depends on representative sampling. However  
10 survey participation can vary and is affected by season (related to farming practices), as well as  
11 community trust and understanding of the study. To maximise participation, we conducted mobile  
12 health clinics alongside the community surveys.  
13  
14  
15

16  
17 The second main limitation relates to detecting pneumococcal carriage in our study population of  
18 children hospitalised with respiratory infection. In this population, carriage detection may be affected  
19 by the prior use of antibiotics.<sup>41 42</sup> To address this, we have, where possible, aimed to recruit patients  
20 at admission, prior to receiving antibiotics or documented prior antibiotic use, which will be taken into  
21 account during analysis.  
22  
23

24  
25 Thirdly, there are variations in methods and setting across the three sites. This limitation may impact  
26 on the comparability of our results across the three sites. The reason for the differences in methods  
27 between sites is that our study is built on pre-existing studies (pneumonia aetiology studies in Lao  
28 PDR and PNG, and a vaccine impact study in Mongolia) with established protocols.  
29

30  
31 To conclude, the results of this study will provide important feedback to national policy makers about  
32 the effects of newly introduced PCV programs in Lao PDR, Mongolia, and PNG. The results will help  
33 us understand the determinants of indirect effects and therefore guide strategies to maximise them. In  
34 particular, the results will also inform global policy about the vaccine coverage required to achieve  
35 substantial indirect effects in settings with different epidemiological characteristics of pneumococcal  
36 disease and carriage and will maximise the cost-effectiveness of the vaccine programs.  
37  
38

### 39 **Acknowledgements:**

40  
41 We would like to acknowledge the Ministries of Health of Lao PDR and Mongolia, LOMWRU, PNG  
42 IMR and WHO and support from the Victorian Government's Operational Infrastructure Support  
43 Program. We would also like to thank study staff, laboratory staff and participating families.  
44

45  
46 The PneuCAPTIVE protocol development group includes the authors of the paper listed in the by-line  
47 and the following: Dashtseren Luvsantseren (NCCD, Ulaanbaatar, Mongolia), Bujinlkham (NCCD,  
48 Ulaanbaatar, Mongolia), Mukhchuluun Ulziibayar (NCCD, Ulaanbaatar, Mongolia), Dashpagam  
49 (NCCD, Ulaanbaatar, Mongolia), Audrey Dubot-Pérès (LOMHWRU, Vientiane, Lao PDR),  
50 Keodomphone Vilavong (LOMHWRU, Vientiane, Lao PDR), Anisone Chanthongthip (LOMHWRU,  
51 Vientiane, Lao PDR), Syladeth Chanthaphone (LOMHWRU, Vientiane, Lao PDR), Joycelyn Sapura  
52 (PNG IMR, Goroka, PNG), John Kave (PNG IMR, Goroka, PNG), Tonny Kumani (PNG IMR, Goroka,  
53 PNG), Wendy Kirarock (PNG IMR, Goroka, PNG).  
54  
55  
56  
57  
58  
59  
60

1  
2  
3 **Author's contributions:** FR conceived the idea and designed the study. JL, SD, KF, PN, RL, RP,  
4 AX, DD and FR supported the development of country-specific protocols and study implementation in  
5 Lao PDR. CCB, RF, DL, WP and FR supported the development of country-specific protocols and  
6 study implementation in PNG. TM, SLV, CVM, KM, JC and FR supported the development of  
7 country-specific protocols and study implementation in Mongolia. CS, ED and JH devised the  
8 microbiological approach and laboratory protocols. JC, CN, RA, and FR devised the analysis plan. JC  
9 and FR drafted the manuscript. All authors provided feedback to the draft manuscript and have read  
10 and approved the final version.  
11  
12

13  
14 **Funding statement:** This work is supported by the Bill & Melinda Gates Foundation grant number  
15 (OPP1115490). JC is completing a PhD at The University of Melbourne, funded by an Australian  
16 Government Research Training Program scholarship.  
17

18 **Competing interests:** None declared.  
19

## 20 21 REFERENCES

- 22 1. Wang H, Bhutta ZA, Coates MM, et al. Global, regional, national, and selected subnational levels of  
23 stillbirths, neonatal, infant, and under-5 mortality 1980-2015: a systematic analysis for the Global  
24 Burden of Disease Study 2015. *The Lancet* 2016;388(10053):1725-74. doi: 10.1016/S0140-  
25 6736(16)31575-6  
26  
27  
28 2. Hill PC, Townend J, Antonio M, et al. Transmission of *Streptococcus pneumoniae* in rural Gambian  
29 villages: a longitudinal study. *Clinical Infectious Diseases* 2010;50(11):1468-76. doi:  
30 <http://dx.doi.org/10.1086/652443>  
31  
32 3. Hussain M, Melegaro A, Pebody RG, et al. A longitudinal household study of *Streptococcus*  
33 *pneumoniae* nasopharyngeal carriage in a UK setting. *Epidemiology and Infection* 2005;133(5):891-  
34 98. doi: <http://dx.doi.org/10.1017/S0950268805004012>  
35  
36 4. Gray BM, Converse GM, 3rd, Dillon HC, Jr. Epidemiologic studies of *Streptococcus pneumoniae* in  
37 infants: acquisition, carriage, and infection during the first 24 months of life. *The Journal of infectious*  
38 *diseases* 1980;142(6):923-33. [published Online First: 1980/12/01]  
39  
40 5. Varon E, Cohen R, Bechet S, et al. Invasive disease potential of pneumococci before and after the  
41 13-valent pneumococcal conjugate vaccine implementation in children. *Vaccine* 2015;33(46):6178-85.  
42  
43 6. Johnson HL, Deloria-Knoll M, Levine OS, et al. Systematic evaluation of serotypes causing  
44 invasive pneumococcal disease among children under five: the pneumococcal global serotype  
45 project. *PLoS Med* 2010;7(10) doi: 10.1371/journal.pmed.1000348 [published Online First:  
46 2010/10/20]  
47  
48 7. Loo JD, Conklin L, Fleming-Dutra KE, et al. Systematic review of the effect of pneumococcal  
49 conjugate vaccine dosing schedules on prevention of pneumonia. *The Pediatric infectious disease*  
50  
51  
52  
53  
54  
55  
56  
57  
58  
59  
60

- 1  
2  
3 *journal* 2014;33 Suppl 2:S140-51. doi: 10.1097/inf.0000000000000082 [published Online First:  
4 2013/12/18]  
5
- 6 8. Conklin L, Loo JD, Kirk J, et al. Systematic review of the effect of pneumococcal conjugate vaccine  
7 dosing schedules on vaccine-type invasive pneumococcal disease among young children. *The*  
8 *Pediatric infectious disease journal* 2014;33 Suppl 2:S109-18. doi: 10.1097/inf.0000000000000078  
9 [published Online First: 2013/12/18]  
10
- 11 9. Le Saux N. Pneumococcal conjugate vaccines for preventing otitis media. *Paediatrics & Child*  
12 *Health* 2016;21(2):89-90.  
13
- 14 10. Loo JD, Conklin L, Fleming-Dutra KE, et al. Systematic review of the indirect effect of  
15 pneumococcal conjugate vaccine dosing schedules on pneumococcal disease and colonization.  
16 *Pediatric Infectious Disease Journal* 2014;33 Suppl 2:S161-71.  
17
- 18 11. Direct and indirect effects of routine vaccination of children with 7-valent pneumococcal conjugate  
19 vaccine on incidence of invasive pneumococcal disease--United States, 1998-2003. *MMWR Morbidity*  
20 *and mortality weekly report* 2005;54(36):893-7. [published Online First: 2005/09/16]  
21
- 22 12. Tsaban G, Ben-Shimol S. Indirect (herd) protection, following pneumococcal conjugated vaccines  
23 introduction: A systematic review of the literature. *Vaccine* 2017;35(22):2882-91. doi:  
24 10.1016/j.vaccine.2017.04.032 [published Online First: 2017/04/30]  
25
- 26 13. Loughlin AM, Hsu K, Silverio AL, et al. Direct and indirect effects of PCV13 on nasopharyngeal  
27 carriage of PCV13 unique pneumococcal serotypes in Massachusetts' children. *The Pediatric*  
28 *infectious disease journal* 2014;33(5):504-10. doi: 10.1097/inf.0000000000000279 [published Online  
29 First: 2014/03/29]  
30
- 31 14. Grant LR, Hammitt LL, O'Brien SE, et al. Impact of the 13-valent pneumococcal conjugate vaccine  
32 on pneumococcal carriage among American Indians. *The Pediatric infectious disease journal*  
33 2016;35(8):907-14. doi: 10.1097/inf.0000000000001207 [published Online First: 2016/05/14]  
34
- 35 15. International Vaccine Access Center - John Hopkins Bloomberg School of Public Health. VIEW-  
36 hub 2016 [accessed 17/12/2016].  
37
- 38 16. Shiri T, Datta S, Madan J, et al. Indirect effects of childhood pneumococcal conjugate vaccination  
39 on invasive pneumococcal disease: a systematic review and meta-analysis. *The Lancet Global Health*  
40 2017;5(1):e51-e59. doi: 10.1016/s2214-109x(16)30306-0  
41
- 42 17. Mackenzie GA, Hill PC, Jeffries DJ, et al. Effect of the introduction of pneumococcal conjugate  
43 vaccination on invasive pneumococcal disease in The Gambia: a population-based surveillance  
44 study. *The Lancet Infectious diseases* 2016;16(6):703-11. doi: 10.1016/s1473-3099(16)00054-2  
45 [published Online First: 2016/02/22]  
46  
47  
48  
49  
50  
51  
52  
53  
54  
55  
56  
57  
58  
59  
60

- 1  
2  
3 18. von Gottberg A, de Gouveia L, Tempia S, et al. Effects of vaccination on invasive pneumococcal  
4 disease in South Africa. *The New England journal of medicine* 2014;371(20):1889-99. doi:  
5 10.1056/NEJMoa1401914 [published Online First: 2014/11/12]  
6  
7  
8 19. Rodgers GL, Klugman KP. Surveillance of the impact of pneumococcal conjugate vaccines in  
9 developing countries. *Human Vaccines and Immunotherapeutics* 2016;12(2):417-20. doi:  
10 <http://dx.doi.org/10.1080/21645515.2015.1057671>  
11  
12  
13 20. Gladstone RA, Jefferies JM, Tocheva AS, et al. Five winters of pneumococcal serotype  
14 replacement in UK carriage following PCV introduction. *Vaccine* 2015;33(17):2015-21.  
15  
16  
17 21. Dunne EM, Manning J, Russell FM, et al. Effect of pneumococcal vaccination on nasopharyngeal  
18 carriage of *Streptococcus pneumoniae*, *Haemophilus influenzae*, *Moraxella catarrhalis*, and  
19 *Staphylococcus aureus* in Fijian children. *J Clin Microbiol* 2012;50(3):1034-8. doi: 10.1128/jcm.06589-  
20 11 [published Online First: 2011/12/16]  
21  
22  
23 22. Mosser JF, Grant LR, Millar EV, et al. Nasopharyngeal carriage and transmission of  
24 *Streptococcus pneumoniae* in American Indian households after a decade of pneumococcal  
25 conjugate vaccine use.[Erratum appears in PLoS One. 2014;9(3):e93878]. *PLoS ONE [Electronic*  
26 *Resource]* 2014;9(1):e79578.  
27  
28  
29 23. Lehmann D, Gratten M, Montgomery J. Susceptibility of pneumococcal carriage isolates to  
30 penicillin provides a conservative estimate of susceptibility of invasive pneumococci. *The Pediatric*  
31 *infectious disease journal* 1997;16(3):297-305. [published Online First: 1997/03/01]  
32  
33  
34 24. Nguyen VH, Dubot-Peres A, Russell FM, et al. Acute respiratory infections in hospitalized children  
35 in Vientiane, Lao PDR - the importance of Respiratory Syncytial Virus. *Scientific reports*  
36 2017;7(1):9318. doi: 10.1038/s41598-017-09006-6 [published Online First: 2017/08/26]  
37  
38  
39 25. Blyth CC, Ford R, Sapura J, et al. Childhood pneumonia and meningitis in the Eastern Highlands  
40 Province, Papua New Guinea in the era of conjugate vaccines: study methods and challenges.  
41 *Pneumonia (Nathan Qld)* 2017;9:5. doi: 10.1186/s41479-017-0029-y [published Online First:  
42 2017/07/14]  
43  
44  
45 26. Satzke C, Turner P, Virolainen-Julkunen A, et al. Standard method for detecting upper respiratory  
46 carriage of *Streptococcus pneumoniae*: updated recommendations from the World Health  
47 Organization Pneumococcal Carriage Working Group. *Vaccine* 2013;32(1):165-79. doi:  
48 10.1016/j.vaccine.2013.08.062 [published Online First: 2013/12/18]  
49  
50  
51 27. Dunne EM, Manning J, Russell FM, et al. Effect of Pneumococcal Vaccination on Nasopharyngeal  
52 Carriage of *Streptococcus pneumoniae*, *Haemophilus influenzae*, *Moraxella catarrhalis*, and  
53 *Staphylococcus aureus* in Fijian Children. *Journal of Clinical Microbiology* 2012;50(3):1034-38. doi:  
54 10.1128/JCM.06589-11  
55  
56  
57  
58  
59  
60

- 1  
2  
3 28. Satzke C, Dunne EM, Porter BD, et al. The PneuCarriage Project: A Multi-Centre Comparative  
4 Study to Identify the Best Serotyping Methods for Examining Pneumococcal Carriage in Vaccine  
5 Evaluation Studies. *PLoS Medicine / Public Library of Science* 2015;12(11):e1001903; discussion  
6 e03.  
7  
8  
9 29. Newton R, Hinds J, Wernisch L. Empirical Bayesian models for analysing molecular serotyping  
10 microarrays. *BMC bioinformatics* 2011;12:88. doi: 10.1186/1471-2105-12-88 [published Online First:  
11 2011/04/02]  
12  
13  
14 30. Scott P, Rutjes AW, Bermetz L, et al. Comparing pneumococcal conjugate vaccine schedules  
15 based on 3 and 2 primary doses: systematic review and meta-analysis. *Vaccine* 2011;29(52):9711-  
16 21. doi: 10.1016/j.vaccine.2011.07.042 [published Online First: 2011/08/09]  
17  
18  
19 31. Chan J. High agreement between the new Mongolian electronic immunisation register and clinic  
20 immunisation records: a health centre based audit. *Western Pacific Surveillance and Response*  
21 *Journal* 2017;In press  
22  
23  
24 32. Deen J, Ali M, Sack D. Methods to assess the impact of mass oral cholera vaccination campaigns  
25 under real field conditions. *PLoS ONE* 2014;9(2):e88139. doi: 10.1371/journal.pone.0088139  
26  
27  
28 33. Khatib AM, Ali M, von Seidlein L, et al. Effectiveness of an oral cholera vaccine in Zanzibar:  
29 findings from a mass vaccination campaign and observational cohort study. *The Lancet Infectious*  
30 *diseases* 2012;12(11):837-44. doi: 10.1016/s1473-3099(12)70196-2 [published Online First:  
31 2012/09/08]  
32  
33  
34 34. Moore MR, Hyde TB, Hennessy TW, et al. Impact of a conjugate vaccine on community-wide  
35 carriage of nonsusceptible *Streptococcus pneumoniae* in Alaska. *Journal of Infectious Diseases*  
36 2004;190(11):2031-8.  
37  
38  
39 35. Usuf E, Bottomley C, Adegbola RA, et al. Pneumococcal carriage in sub-Saharan Africa - A  
40 systematic review. *PLoS ONE* 2014;9 (1) (no pagination)(e85001) doi:  
41 <http://dx.doi.org/10.1371/journal.pone.0085001>  
42  
43  
44 36. Aho C, Michael A, Yoannes M, et al. Limited impact of neonatal or early infant schedules of 7-  
45 valent pneumococcal conjugate vaccination on nasopharyngeal carriage of *Streptococcus*  
46 *pneumoniae* in Papua New Guinean children: A randomized controlled trial. *Vaccine Reports*  
47 2016;6:36-43. doi: <http://dx.doi.org/10.1016/j.vacrep.2016.08.002>  
48  
49  
50 37. Sterne JAC, White IR, Carlin JB, et al. Multiple imputation for missing data in epidemiological and  
51 clinical research: potential and pitfalls. *Bmj* 2009;338 doi: 10.1136/bmj.b2393  
52  
53  
54  
55  
56  
57  
58  
59  
60

- 1  
2  
3 38. Isaacman DJ, Strutton DR, Kalpas EA, et al. The impact of indirect (herd) protection on the cost-  
4 effectiveness of pneumococcal conjugate vaccine. *Clinical therapeutics* 2008;30(2):341-57. doi:  
5 10.1016/j.clinthera.2008.02.003 [published Online First: 2008/03/18]  
6  
7  
8 39. Rodgers GL, Klugman KP. A new paradigm in pneumococcal conjugate vaccination: moving from  
9 individual to herd protection. *International journal of infectious diseases : IJID : official publication of*  
10 *the International Society for Infectious Diseases* 2017 doi: 10.1016/j.ijid.2017.04.015  
11  
12  
13 40. Roca A, Bottomley C, Hill PC, et al. Effect of age and vaccination with a pneumococcal conjugate  
14 vaccine on the density of pneumococcal nasopharyngeal carriage. *Clinical Infectious Diseases*  
15 2012;55(6):816-24.  
16  
17  
18 41. Abdullahi O, Karani A, Tigoi CC, et al. The prevalence and risk factors for pneumococcal  
19 colonization of the nasopharynx among children in Kilifi District, Kenya. *PLoS One* 2012;7(2):e30787.  
20 doi: 10.1371/journal.pone.0030787 [published Online First: 2012/03/01]  
21  
22  
23 42. Alpkvist H, Athlin S, Naucner P, et al. Clinical and Microbiological Factors Associated with High  
24 Nasopharyngeal Pneumococcal Density in Patients with Pneumococcal Pneumonia. *PLoS One*  
25 2015;10(10):e0140112. doi: 10.1371/journal.pone.0140112 [published Online First: 2015/10/16]  
26  
27  
28  
29  
30  
31  
32  
33  
34  
35  
36  
37  
38  
39  
40  
41  
42  
43  
44  
45  
46  
47  
48  
49  
50  
51  
52  
53  
54  
55  
56  
57  
58  
59  
60

# BMJ Open

## DETERMINING THE PNEUMOCOCCAL CONJUGATE VACCINE COVERAGE REQUIRED FOR INDIRECT PROTECTION AGAINST VACCINE-TYPE PNEUMOCOCCAL CARRIAGE IN LOW- AND MIDDLE-INCOME COUNTRIES: A PROTOCOL FOR A PROSPECTIVE OBSERVATIONAL STUDY

|                               |                                                                                                                                                                                                                                                                                                                                                                                                                                                                                                                                                                                                                                                                                                                                                                                                                                                                                                                                                                                                                                                                                                                                                                                                                                                                                                                                                                                                                                                                                                                                                                                                                                                                                                                                                                                                                                                                                                                                                                                                                                                                                                                                                                                                                                                                                                                                                                                                                                                                                       |
|-------------------------------|---------------------------------------------------------------------------------------------------------------------------------------------------------------------------------------------------------------------------------------------------------------------------------------------------------------------------------------------------------------------------------------------------------------------------------------------------------------------------------------------------------------------------------------------------------------------------------------------------------------------------------------------------------------------------------------------------------------------------------------------------------------------------------------------------------------------------------------------------------------------------------------------------------------------------------------------------------------------------------------------------------------------------------------------------------------------------------------------------------------------------------------------------------------------------------------------------------------------------------------------------------------------------------------------------------------------------------------------------------------------------------------------------------------------------------------------------------------------------------------------------------------------------------------------------------------------------------------------------------------------------------------------------------------------------------------------------------------------------------------------------------------------------------------------------------------------------------------------------------------------------------------------------------------------------------------------------------------------------------------------------------------------------------------------------------------------------------------------------------------------------------------------------------------------------------------------------------------------------------------------------------------------------------------------------------------------------------------------------------------------------------------------------------------------------------------------------------------------------------------|
| Journal:                      | <i>BMJ Open</i>                                                                                                                                                                                                                                                                                                                                                                                                                                                                                                                                                                                                                                                                                                                                                                                                                                                                                                                                                                                                                                                                                                                                                                                                                                                                                                                                                                                                                                                                                                                                                                                                                                                                                                                                                                                                                                                                                                                                                                                                                                                                                                                                                                                                                                                                                                                                                                                                                                                                       |
| Manuscript ID                 | bmjopen-2018-021512.R1                                                                                                                                                                                                                                                                                                                                                                                                                                                                                                                                                                                                                                                                                                                                                                                                                                                                                                                                                                                                                                                                                                                                                                                                                                                                                                                                                                                                                                                                                                                                                                                                                                                                                                                                                                                                                                                                                                                                                                                                                                                                                                                                                                                                                                                                                                                                                                                                                                                                |
| Article Type:                 | Protocol                                                                                                                                                                                                                                                                                                                                                                                                                                                                                                                                                                                                                                                                                                                                                                                                                                                                                                                                                                                                                                                                                                                                                                                                                                                                                                                                                                                                                                                                                                                                                                                                                                                                                                                                                                                                                                                                                                                                                                                                                                                                                                                                                                                                                                                                                                                                                                                                                                                                              |
| Date Submitted by the Author: | 20-Feb-2018                                                                                                                                                                                                                                                                                                                                                                                                                                                                                                                                                                                                                                                                                                                                                                                                                                                                                                                                                                                                                                                                                                                                                                                                                                                                                                                                                                                                                                                                                                                                                                                                                                                                                                                                                                                                                                                                                                                                                                                                                                                                                                                                                                                                                                                                                                                                                                                                                                                                           |
| Complete List of Authors:     | <p>Chan, Jocelyn; Murdoch Childrens Research Institute, Pneumococcal Research Group; The University of Melbourne, Department of Paediatrics<br/>         Nguyen, Cattram; Murdoch Childrens Research Institute, Pneumococcal Research; The University of Melbourne, Department of Paediatrics<br/>         Lai, Jana; Murdoch Childrens Research Institute, Pneumococcal Research Group<br/>         Dunne, Eileen; Murdoch Childrens Research Institute, Pneumococcal Research Group; The University of Melbourne, Department of Paediatrics<br/>         Andrews, Ross; Menzies School of Health Research, Charles Darwin University, Global &amp; Tropical Health Division; Australian National University, National Centre for Epidemiology &amp; Population Health<br/>         Blyth, Christopher C.; University of Western Australia, School of Medicine; Princess Margaret Hospital, Department of Infectious Diseases<br/>         Datta, Siddhartha; World Health Organization<br/>         Fox, Kim; World Health Organization, Regional Office for the Western Pacific<br/>         Ford, Rebecca ; Papua New Guinea Institute of Medical Research<br/>         Hinds, Jason; St George's- University of London, Institute for Infection and Immunity; London Bioscience Innovation Centre, BUGS Bioscience<br/>         La Vincente, Sophie; Murdoch Childrens Research Institute, Pneumococcal Research Group<br/>         Lehmann, Deborah; Telethon Kids Institute, University of Western Australia, Wesfarmers Centre for Vaccines and Infectious Diseases<br/>         Lim, Ruth; Murdoch Childrens Research Institute, Pneumococcal Research Group<br/>         Mungun, Tuya ; Ministry of Health, National Center of Communicable Diseases (NCCD)<br/>         Newton, Paul ; Lao-Oxford-Mahosot Hospital-Wellcome Trust Research Unit , Microbiology Laboratory, Mahosot Hospital; University of Oxford, Centre for Tropical Medicine and Global Health<br/>         Phetsouvanh, Rattanaphone; Lao-Oxford-Mahosot Hospital-Wellcome Trust Research Unit, Microbiology Laboratory, Mahosot Hospital; University of Oxford, Centre for Tropical Medicine and Global Health<br/>         Pomat, Willie; PNG Institute of Medical Research, Infection and Immunity; Telethon Kids Institute, University of Western Australia, Wesfarmers Centre for Vaccines and Infectious Diseases<br/>         Xeuatvongsa, Anonh; Ministry of Health, National Immunization</p> |

|                                 |                                                                                                                                                                                                                                                                                                                                                                                                                                                                                                                                                                                                                                                                                                                                                                                                                                                                                                                                                                         |
|---------------------------------|-------------------------------------------------------------------------------------------------------------------------------------------------------------------------------------------------------------------------------------------------------------------------------------------------------------------------------------------------------------------------------------------------------------------------------------------------------------------------------------------------------------------------------------------------------------------------------------------------------------------------------------------------------------------------------------------------------------------------------------------------------------------------------------------------------------------------------------------------------------------------------------------------------------------------------------------------------------------------|
|                                 | <p>Programme<br/> von Mollendorf, Claire; Murdoch Childrens Research Institute, Pneumococcal Research Group; The University of Melbourne, Department of Paediatrics<br/> Dance, David; Lao-Oxford-Mahosot Hospital-Wellcome Trust Research Unit, Microbiology Laboratory, Mahosot Hospital; University of Oxford, Centre for Tropical Medicine and Global Health<br/> Satzke, Catherine; Murdoch Childrens Research Institute, Pneumococcal Research; The University of Melbourne at the Peter Doherty Institute for Infection and Immunity, Department of Microbiology and Immunology<br/> Muholland , Kim; Murdoch Childrens Research Institute, Pneumococcal Research Group; London School of Hygiene and Tropical Medicine, Department of Infectious Disease Epidemiology<br/> Russell, F. M.; Murdoch Childrens Research Institute, Pneumococcal Research Group; The University of Melbourne, Centre for International Child Health, Department of Paediatrics</p> |
| <b>Primary Subject Heading</b>: | Global health                                                                                                                                                                                                                                                                                                                                                                                                                                                                                                                                                                                                                                                                                                                                                                                                                                                                                                                                                           |
| Secondary Subject Heading:      | Infectious diseases, Epidemiology                                                                                                                                                                                                                                                                                                                                                                                                                                                                                                                                                                                                                                                                                                                                                                                                                                                                                                                                       |
| Keywords:                       | Public health < INFECTIOUS DISEASES, Paediatric infectious disease & immunisation < PAEDIATRICS, Respiratory infections < THORACIC MEDICINE                                                                                                                                                                                                                                                                                                                                                                                                                                                                                                                                                                                                                                                                                                                                                                                                                             |
|                                 |                                                                                                                                                                                                                                                                                                                                                                                                                                                                                                                                                                                                                                                                                                                                                                                                                                                                                                                                                                         |

SCHOLARONE™  
Manuscripts

view only



1  
2  
3  
4 **DETERMINING THE PNEUMOCOCCAL CONJUGATE VACCINE COVERAGE REQUIRED FOR**  
5 **INDIRECT PROTECTION AGAINST VACCINE-TYPE PNEUMOCOCCAL CARRIAGE IN LOW-**  
6 **AND MIDDLE-INCOME COUNTRIES: A PROTOCOL FOR A PROSPECTIVE OBSERVATIONAL**  
7 **STUDY**

8 **Authors:**

9  
10  
11 Chan J<sup>1,2</sup>, Nguyen CD<sup>1,2</sup>, Lai JYR<sup>1</sup>, Dunne EM<sup>1,2</sup>, Andrews R<sup>3,4</sup>, Blyth CC<sup>5,6</sup>, Datta S<sup>7</sup>, Fox K<sup>8</sup>, Ford  
12 R<sup>9</sup>, Hinds J<sup>10,11</sup>, La Vincente S<sup>1</sup>, Lehmann D<sup>12</sup>, Lim R<sup>1</sup>, Mungun T<sup>13</sup>, Newton PN<sup>14,15</sup>, Phetsouvanh  
13 R<sup>14,15\*</sup>, Pomat W<sup>9,12</sup>, Xeuatvongsa A<sup>16</sup>, von Mollendorf C<sup>1,2</sup>, Dance DAB<sup>14,15</sup> Satzke C<sup>1,17</sup>, Mulholland  
14 K<sup>1,18</sup>, Russell FM<sup>1,19</sup> for the PneuCAPTIVE Protocol Group

- 17 1. Pneumococcal Research Group, Murdoch Children's Research Institute, Melbourne,  
18 Australia.
- 19 2. Department of Paediatrics, The University of Melbourne, Melbourne, Australia.
- 20 3. Global & Tropical Health Division, Menzies School of Health Research, Charles Darwin  
21 University, Darwin, Australia.
- 22 4. National Centre for Epidemiology & Population Health, Australian National University,  
23 Canberra, Australia
- 24 5. University of Western Australia, School of Medicine, Perth, Australia;
- 25 6. Department of Infectious Diseases, Princess Margaret Hospital, Perth, Australia;
- 26 7. World Health Organization, Vientiane, Lao People's Democratic Republic
- 27 8. Regional Office for the Western Pacific, World Health Organization, Manila, Philippines.
- 28 9. Papua New Guinea Institute of Medical Research, Infection and Immunity Unit, Goroka,  
29 Papua New Guinea.
- 30 10. Institute for Infection and Immunity, St George's- University of London, London, United  
31 Kingdom.
- 32 11. BUGS Bioscience, London Bioscience Innovation Centre, London, United Kingdom.
- 33 12. Wesfarmers Centre for Vaccines and Infectious Diseases, Telethon Kids Institute, University  
34 of Western Australia, Perth, Australia.
- 35 13. National Center of Communicable Diseases (NCCD), Ministry of Health, Ulaanbaatar,  
36 Mongolia.
- 37 14. Lao-Oxford-Mahosot Hospital-Wellcome Trust Research Unit (LOMHWRU), Microbiology  
38 Laboratory, Mahosot Hospital, Vientiane, Lao PDR.
- 39 15. Centre for Tropical Medicine and Global Health, University of Oxford, Oxford, United  
40 Kingdom.
- 41 16. National Immunization Programme, Ministry of Health, Vientiane, Lao PDR.
- 42 17. Department of Microbiology and Immunology, The University of Melbourne at the Peter  
43 Doherty Institute for Infection and Immunity, Melbourne, Australia
- 44 18. Department of Infectious Disease Epidemiology, London School of Hygiene and Tropical  
45 Medicine, London, United Kingdom.
- 46
- 47
- 48
- 49
- 50
- 51
- 52
- 53
- 54
- 55
- 56
- 57
- 58
- 59
- 60

1  
2  
3 19. Centre for International Child Health, Department of Paediatrics, The University of Melbourne,  
4 Melbourne, Australia.  
5

6  
7 \*Deceased  
8  
9

10 Corresponding author: Jocelyn Chan

11  
12 Pneumococcal Research Group,  
13 Murdoch Children's Research Institute  
14 50 Flemington Road, Parkville 3052 VIC  
15  
16 Australia  
17

18  
19 Email: [jocelyn.chan@mcri.edu.au](mailto:jocelyn.chan@mcri.edu.au)  
20

21 Telephone: +61 3 9345 4968  
22  
23  
24  
25  
26  
27  
28  
29  
30  
31  
32  
33  
34  
35  
36  
37  
38  
39  
40  
41  
42  
43  
44  
45  
46  
47  
48  
49  
50  
51  
52  
53  
54  
55  
56  
57  
58  
59  
60

## ABSTRACT

### Introduction

Pneumococcal conjugate vaccines (PCVs) prevent disease through both direct protection of vaccinated individuals, and indirect protection of unvaccinated individuals by reducing nasopharyngeal (NP) carriage and transmission of vaccine-type (VT) pneumococci. While the indirect effects of PCV vaccination are well described, the PCV coverage required to achieve the indirect effects is unknown. We will investigate the relationship between PCV coverage and vaccine-type carriage among under-vaccinated children using hospital-based NP pneumococcal carriage surveillance at three sites in the Asia-Pacific region.

### Methods and analysis

We are recruiting cases, defined as children aged 2-59 months admitted to participating hospitals with acute respiratory infection in Lao People's Democratic Republic, Mongolia and Papua New Guinea. Thirteen-valent PCV (PCV13) status is obtained from written records. NP swabs are collected according to standard methods, screened using *lytA* qPCR and serotyped by microarray. Village-level vaccination coverage, for the resident communities of the recruited cases, is determined using administrative data or community survey. Our analysis will investigate the relationship between VT carriage among under-vaccinated cases (indirect effects) and vaccine coverage using generalised estimating equations.

### Ethics and dissemination

Ethical approval has been obtained from the relevant ethics committees at participating sites. The results are intended for publication in open-access peer-reviewed journals and will demonstrate methods suitable for low- and middle-income countries to monitor vaccine impact, and inform vaccine policy makers about the PCV coverage required to achieve indirect protection.

### STRENGTHS AND LIMITATIONS

- This protocol describes a method for monitoring the indirect effects of pneumococcal conjugate vaccines (PVCs) on pneumococcal carriage in low- and middle-income countries, in the absence of baseline pre-PCV data,
- This method does not measure indirect protection against disease. However, a reduction in VT carriage among undervaccinated cases indicates likely reductions in VT disease, since carriage is a precursor for disease. The use of molecular serotyping microarray enables detection of multiple serotype carriage and serotype-specific carriage density
- The inclusion of three sites, which have contrasting vaccine schedules and pneumococcal epidemiology, will enable us to explore factors which may modify the vaccine coverage required to achieve indirect effects however variations in methods and settings may impact on the comparability of our results across the three sites

## INTRODUCTION

Infections due to *Streptococcus pneumoniae* (the pneumococcus), including pneumonia, meningitis and septicaemia, are a leading cause of morbidity and mortality among children and elderly, especially in low- and middle-income countries.<sup>1</sup> The main reservoir for the pneumococcus is the human nasopharynx. Pneumococcal carriage peaks in young children, an important group for transmission of pneumococci to older age groups,<sup>2,3</sup> and is a precursor for disease.<sup>4</sup> There are over 90 known serotypes of pneumococci, with differing capacities for causing disease.<sup>5</sup>

The introduction of the pneumococcal conjugate vaccine (PCV) has resulted in substantial reductions in pneumococcal disease in many settings.<sup>6</sup> These reductions are mediated by direct effects on vaccinated children as well as indirect effects on under-vaccinated children and adults through a reduction in transmission and subsequent nasopharyngeal (NP) carriage of pneumococcal serotypes included in the vaccine.<sup>7-10</sup> The indirect effects account for a substantial component of the overall vaccine effect. Following the introduction of the 7-valent PCV (PCV7) into the routine vaccination program in the USA, twice as many invasive cases were prevented through indirect effects compared to direct effects.<sup>11</sup>

The magnitude of indirect effects following introduction of PCV varies considerably by setting. Reductions in invasive pneumococcal disease (IPD) among adults ranged from 8.8% among adults in Denmark three years after PCV implementation, to 70% reduction among adults in Taiwan, seven years after PCV implementation.<sup>12</sup> A review of the literature found that higher rates of coverage, higher baseline rates of pneumococcal disease and greater time elapsed since PCV introduction were all associated with greater degrees of indirect effects.<sup>12</sup> However, the majority of these studies were conducted in high-income country settings using a similar vaccine schedule, with relatively high levels of vaccine coverage.

The threshold of vaccination coverage required to achieve significant indirect PCV effects on either pneumococcal carriage or disease outcomes are not well understood. Studies of NP carriage indicate that there is variability in the coverage required to achieve significant indirect effects. Two studies in the US examined this question for the 13-valent PCV (PCV13) that superseded 7-valent (PCV7) immunisation. A vaccine coverage of 58% among American Indian children in south-western USA and 75% coverage among children in Massachusetts resulted in a 50% decline in the prevalence of carriage of six PCV13 serotypes (i.e. PCV13 types not included in PCV7) carried by under-vaccinated children.<sup>13,14</sup> The US uses a 3+1 schedule (three primary doses with a booster) and had a catch-up program up to five years of age. Many low- and middle-income countries utilise a 3+0 schedule.<sup>15</sup> More data are needed from a range of low- and middle-income countries to determine the vaccination coverage required to maximise the indirect effects of PCVs, and to determine factors which may modify the vaccine coverage required for indirect effects, such as baseline carriage prevalence, indicating intensity of transmission, vaccine schedules and use of catch-up campaigns.

Existing systematic reviews indicate that vaccine schedules do not impact on the degree of indirect effects on IPD, however the studies included in these reviews predominantly use a 3+1 schedule or a

1  
2  
3 2+1 schedule (two primary doses with a booster) and have limited studies using PCV13.<sup>12 16</sup> Few  
4 studies using the 3+0 schedule (three primary doses with no booster) are available in the published  
5 literature, despite the 3+0 schedule being widely used, especially in low- and middle-income  
6 countries. A recent study from Australia, the only high-income country to use the 3+0 schedule,  
7 concluded that the booster dose may be important for obtaining indirect protection because of the  
8 lower indirect effects observed compared to other high-income country settings.<sup>17</sup>  
9

10  
11 Despite the gradual introduction of PCVs in low- and middle-income countries over the last decade,  
12 there have been few studies published on the impacts of PCV in these settings.<sup>18 19</sup> This is because  
13 the predominant method for assessing vaccine impact, IPD surveillance, is costly and resource-  
14 intensive to establish – requiring laboratory capacity as well as the collection of large numbers of  
15 samples, obtained using aseptic techniques, in order to detect a relatively rare outcome.<sup>20</sup>  
16 Furthermore, baseline data prior to vaccine introduction required for impact evaluations are often not  
17 available in these settings.  
18

19  
20  
21 In the absence of IPD surveillance, low- and middle-income countries require a method to evaluate  
22 direct and indirect vaccine effects. We propose using NP carriage surveillance in children hospitalised  
23 with acute respiratory infection to monitor the indirect effects of PCV13 in the study called  
24 PneuCAPTIVE (PNEUmococcal CArriage in Pneumonia To Investigate Vaccine Effects).  
25

26  
27 In this context, we refer to “carriage” as the detection of pneumococci in the nasopharynx of a child  
28 with acute respiratory infection. A reduction in vaccine-type (VT) pneumococcal carriage will likely  
29 reflect reductions in disease due to VT pneumococci, since carriage is a precursor to disease.<sup>4</sup>  
30 Existing studies among healthy children have demonstrated reductions in VT carriage following PCV  
31 introduction, while overall carriage remains stable due to replacement with non-vaccine type (NVT)  
32 carriage.<sup>21 22</sup>  
33

34  
35  
36 We aim to determine the PCV13 coverage required to demonstrate substantial indirect effects of PCV  
37 using NP carriage surveillance in children hospitalised with acute respiratory infection (ARI) in three  
38 settings within the Asia-Pacific region. We are focussing on children under five years of age because  
39 studies have shown that children are the main reservoir for pneumococci, and reductions in  
40 transmission within this age group are likely to result in reductions in VT carriage among older age  
41 groups.<sup>2 3 23</sup>  
42

43  
44  
45 As this is a novel method for determining indirect effects, we will also aim to determine whether  
46 changes in patterns of VT and NVT pneumococcal carriage among children with ARI are reflective of  
47 changes in serotypes circulating in the community, noting that carriage in our cohort may be more  
48 reflective of serotypes causing disease.<sup>5 24</sup>  
49

## 50 51 **OBJECTIVES**

52  
53 Our objectives are to: (1) investigate the relationship between PCV13 coverage and VT carriage  
54 among under-vaccinated cases, defined as children (indirect effects) aged 2-59 months with an ARI in  
55 Lao People’s Democratic Republic (Lao PDR), Mongolia and Papua New Guinea (PNG); (2) describe  
56  
57

1  
2  
3 monthly trends in VT carriage prevalence among cases and contacts. Contacts are defined as  
4 children 0-59 months of age, who have slept in the same house as or played with the case during the  
5 preceding three weeks; (3) investigate the relationship between PCV13 coverage and VT carriage  
6 among under-vaccinated contacts (indirect effects) and caregivers living in the community; and (4)  
7 compare the PCV13 coverage required to demonstrate indirect effects of PCV13 by site and  
8 determine the degree to which site-specific factors, such as baseline pneumococcal carriage rates  
9 and densities, vaccine schedule and use of catch-up campaigns, account for differences in the  
10 PCV13 coverage required to demonstrate indirect effects.  
11  
12  
13

## 14 **METHODS**

### 15 **Study design**

16 We are conducting prospective hospital-based observational studies in Lao PDR, Mongolia and PNG.  
17 We are recruiting children 2-59 months of age presenting with ARI and obtaining NP swabs to  
18 determine prevalence and density of VT carriage. We are determining the PCV13 status of each case  
19 using written record. Recruitment will occur over at least three years and up to five years post-PCV13  
20 introduction at each site.  
21  
22  
23

24 Concurrently, we are determining vaccination coverage at the resident village or subdistrict of each  
25 recruited case, using either administrative data or vaccination coverage surveys.  
26  
27

### 28 **Study settings**

#### 29 **Lao PDR site**

30 The Lao PDR PneuCAPTIVE study is embedded within a hospital-based study of ARI aetiology, in  
31 collaboration with Lao Oxford Mahosot Hospital-Wellcome Trust Research Unit (LOMWRU), the  
32 World Health Organization (WHO) and the Lao PDR Ministry of Health<sup>25</sup>. PCV13 was introduced in  
33 October 2013, using a 3+0 schedule at 6, 10 and 14 weeks of age and a catch-up program up to 12  
34 months of age (Table 1). We will recruit cases at Mahosot Hospital, one of the largest paediatric  
35 referral hospitals in Vientiane, the capital of Lao PDR.  
36  
37  
38

#### 39 **Mongolia site**

40 The Mongolian PneuCAPTIVE study is embedded within a hospital-based paediatric pneumonia  
41 surveillance to determine vaccine impact which is conducted in partnership between Murdoch  
42 Children's Research Institute (MCRI), WHO and the Mongolian Ministry of Health. PCV13 was  
43 introduced in June 2016, using a modified 2+1 schedule at 2, 4 and 9 months of age, within the two  
44 'Phase 1' districts within Ulaanbaatar, the capital of Mongolia as part of a phased introduction (Table  
45 1), with a catch-up program of two doses one month apart for those up to 24 months of age. We are  
46 recruiting cases, residing in the two phase 1 districts, at the two district hospitals and the tertiary  
47 referral paediatric hospital for Mongolia, the Maternal and Child Hospital (MCH).  
48  
49  
50  
51

#### 52 **PNG site**

53 The PNG PneuCAPTIVE study represents a collaboration between the PNG Institute of Medical  
54 Research (IMR), Telethon Kids Institute, the University of Western Australia and MCRI. It is an  
55 extension of a pneumonia aetiology study that commenced in 2013<sup>26</sup>. PCV13 was introduced to PNG  
56  
57  
58

in October 2014 using a 3+0 schedule at 1, 2 and 3 months of age (Table 1), however was not widely distributed in the Eastern Highlands Province until late 2015. We are recruiting cases at the Eastern Highlands Provincial Hospital, the major referral hospital for the Eastern Highland Province, as well as nearby clinics in Goroka, the capital of the Eastern Highlands Province. In PNG, we are also recruiting caregivers, as well as contacts, defined as children 0-59 months of age, who have slept in the same house as or played with the case during the preceding three weeks. This will enable us to determine whether changes in patterns of VT pneumococcal carriage in the hospitalised cases are reflective of changes within the community, as well as to examine indirect effects in the adult age group.

Table 1: Key aspects of the 13-valent pneumococcal conjugate vaccination (PCV13) program by site, Lao People's Democratic Republic (PDR), Mongolia and Papua New Guinea (PNG)

|                                | Lao PDR                                        | Mongolia                                                      | PNG                     |
|--------------------------------|------------------------------------------------|---------------------------------------------------------------|-------------------------|
| Year of PCV13 introduction     | Oct 2013                                       | Jun 2016                                                      | Oct 2014                |
| Location of PCV13 introduction | National                                       | Two districts in Ulaanbaatar                                  | National                |
| PCV13 schedule                 | 3+0 (6, 10 and 14 weeks)                       | 2+1 (2, 4, and 9 months)                                      | 3+0 (1, 2 and 3 months) |
| Presence of a catch-up program | Catch-up of three doses up to 12 months of age | Catch-up of two doses two months apart up to 24 months of age | None                    |

### Case recruitment and data collection

Participant recruitment and data collection are consistent across the three sites; however there are some local adaptations to the protocol at each site which are summarised in Table 2. These adaptations are due to the PneuCAPTIVE study being nested within other existing studies, described above.

Cases are eligible for inclusion in the PneuCAPTIVE study if they are 2-59 months of age, and presenting with ARI (defined in Table 2 below). All cases with fever or respiratory symptoms are screened for inclusion. In Mongolia, we are restricting recruitment to patients living within the two 'Phase 1' districts which have commenced PCV13 in 2016. In PNG, we are restricting recruitment to patients living within one hour of the town as follow-up is logistically challenging.

Regarding recruitment, in Lao PDR, study staff are screening potential recruits from Monday to Friday each week. However, they are obtaining clinical information from medical records for all eligible cases, including those admitted at weekends to ensure we have a representative sample. In Mongolia, caregivers of all eligible children presenting to the hospital will be approached for recruitment as part of the larger PCV impact study. However, for the purposes of this study we will select a random sample of 33 cases per month for microbiological testing. In PNG recruitment takes place 4-5 days per week.

Table 2: Patient eligibility by site, Lao People's Democratic Republic (PDR), Mongolia and Papua New Guinea (PNG)

| Site                                             | Lao PDR                                                                                                                                                                                 | Mongolia                                                                                                                                                                                                                                                            | PNG                                                                                                                                                                  |
|--------------------------------------------------|-----------------------------------------------------------------------------------------------------------------------------------------------------------------------------------------|---------------------------------------------------------------------------------------------------------------------------------------------------------------------------------------------------------------------------------------------------------------------|----------------------------------------------------------------------------------------------------------------------------------------------------------------------|
| <b>Inclusion criteria</b>                        | 2-59 months of age and presenting with:                                                                                                                                                 |                                                                                                                                                                                                                                                                     |                                                                                                                                                                      |
| <b>Definition of acute respiratory infection</b> | Fever (parent report or measured) AND one of cough OR dyspnoea OR rhinitis OR abnormal chest auscultation                                                                               | Cough OR dyspnoea AND tachypnoea* OR hypoxia OR chest indrawing                                                                                                                                                                                                     | Cough AND tachypnoea* AND lower chest wall indrawing                                                                                                                 |
| <b>Exclusion criteria</b>                        | -                                                                                                                                                                                       | Lives outside Phase 1 district<br>Admitted with pneumonia in the last 14 days                                                                                                                                                                                       | Lives $\geq$ 1 hour outside town OR hospitalisation in past 14 days                                                                                                  |
| <b>Recruitment site</b>                          | Inpatient setting only                                                                                                                                                                  | Inpatient setting only                                                                                                                                                                                                                                              | Inpatient and outpatient setting                                                                                                                                     |
| <b>Sampling</b>                                  | Monday-Friday                                                                                                                                                                           | A random sample (33 per month) of all enrolled cases are selected for testing                                                                                                                                                                                       | Monday- Friday                                                                                                                                                       |
| <b>Sampling period</b>                           | December 2013- November 2019                                                                                                                                                            | November 2015 – October 2018 <sup>†</sup>                                                                                                                                                                                                                           | April 2016 – March 2019                                                                                                                                              |
| <b>Study population</b>                          | Mahosot Hospital is one of two tertiary-level paediatric hospitals in Vientiane and receives a mix of patients from urban Vientiane city, rural Vientiane province and other provinces. | The two secondary-level district hospitals and a tertiary-level Maternal and Child Health hospital service the vast majority of children in the two districts that received PCV. There are a limited number of paediatric beds at private hospitals in Ulaanbaatar. | The Eastern Highlands Provincial hospital is the sole hospital for the province. Study population includes urban and rural households within 1 hour drive of Goroka. |

\* Tachypnoea is defined as greater than or equal to 50 breaths per minute

<sup>†</sup> A one-year extension (until June 2019) has been sought for the Mongolian site

After determining eligibility and obtaining informed parental consent, we complete a questionnaire to obtain: demographic data, clinical data, PCV13 status, and risk factors for vaccination and NP



1  
2  
3 carriage, including prior antibiotic use (see analysis section below for complete list). Vaccination  
4 status is determined using written records – either parent-held immunisation records or health centre  
5 administrative records.  
6

7 We then collect an NP swab according to WHO guidelines and store it in 1 ml skim milk tryptone  
8 glucose glycerol (STGG) medium.<sup>27</sup> Swabs are vortexed, aliquoted, and stored frozen at -80°C within  
9 8 hours of collection, and transported from all three sites to the Pneumococcal Research laboratory at  
10 MCRI on dry ice or in liquid nitrogen, where they will be stored at -80°C.  
11  
12

### 13 **Laboratory methods**

14 All samples are screened for the presence of pneumococci using real-time quantitative PCR (qPCR)  
15 assay targeting the pneumococcal *lytA* gene.<sup>28</sup> Genomic DNA are extracted from 100 µl of STGG  
16 using a MagNA Pure LC Machine (Roche) using the DNA Isolation Kit III (Bacteria, Fungi) (Roche)  
17 following an enzymatic lysis treatment. The pneumococcal load is estimated by reference to a  
18 standard curve.  
19  
20  
21

22 All swabs that are *lytA* positive or equivocal are molecular serotyped using BµG@S Senti-SP v1.5  
23 microarray (BUGS Bioscience) as previously described.<sup>29</sup>  
24

25 Serotype-specific pneumococcal density is calculated using the relative abundance of each serotype  
26 identified, as determined using microarray and interpreted with the assistance of a Bayesian random  
27 effects model as previously described,<sup>29 30</sup> and the overall pneumococcal load as determined by the  
28 *lytA* qPCR.  
29  
30

### 31 **Key definitions**

32 The primary outcome, VT carriage, is defined as the NP carriage of at least one pneumococcal  
33 serotype included in the PCV13 vaccine, i.e. serotypes 1, 3, 4, 5, 6A, 6B, 7F, 9V, 14, 18C, 19A, 19F,  
34 and 23F. In the context of multiple serotype carriage, VT carriage will be defined as the presence of at  
35 least one VT serotype regardless of the presence of other serotypes. A secondary outcome is VT  
36 carriage density (CFU/mL) which is defined as an aggregate of the serotype-specific density for each  
37 of the VTs carried by the case, and will be reported as a continuous variable using a log scale to  
38 account for large variations in density and a skewed distribution.  
39  
40  
41  
42

43 Vaccine history will be defined based on documented evidence of receiving an adequate number of  
44 PCV doses to provide a protective immune response against vaccine serotypes at least 14 days prior  
45 to study enrolment.<sup>31</sup> For children < 12 months of age, 'vaccinated' is defined as two or more PCV13  
46 doses. For children 12 months of age or older, 'vaccinated' is defined as receipt of 2 doses in the first  
47 year of life or at least 1 dose after the age of 12 months. Conversely, a case will be defined as 'under-  
48 vaccinated' if they have received less than the adequate number of PCV doses (including those never  
49 vaccinated). Sensitivity analyses will be conducted using varying definitions of vaccinated including  
50 receiving at least one dose of vaccine at any age.  
51  
52  
53  
54  
55  
56  
57  
58  
59  
60

### Vaccine coverage data collection

For each under-vaccinated case recruited (including those with and without VT pneumococci), we are determining their resident village or subdistrict vaccination coverage. In Mongolia and Lao PDR, we are using administrative data. The resident village or subdistrict is identified using relevant administrative codes, which are determined by local staff on enrolment. This determines the health centre's administrative boundary for the provision of immunisation services, whereas in PNG, we are conducting community surveys within 10 days of discharge in the village where the case is living (Table 3). We are surveying all children less than five years of age, from households within 5 minutes' walk of the case, since this is the group of children with whom the case is mostly likely to interact and therefore influence their carriage status.

To determine the reliability of our methods in Lao PDR, we plan on comparing our coverage estimates with a National Immunisation Survey, conducted according to WHO guidelines in 2015, when provincial level estimates from this survey become available. In Mongolia, we have validated the newly introduced electronic immunisation record against clinic health records, finding a high degree of concordance.<sup>32</sup> We are also in the process of validating the population registers at health centres in Mongolia.

Table 3: Vaccination coverage data by site, Lao People's Democratic Republic (PDR), Mongolia and Papua New Guinea

| Site                       | Lao PDR                                    | Mongolia                           | Papua New Guinea  |
|----------------------------|--------------------------------------------|------------------------------------|-------------------|
| Source of numerator data   | Health centre records                      | Electronic immunisation record     | Community surveys |
| Source of denominator data | Lao PDR Population and Housing Census 2015 | Health centre population register* |                   |

\* All children are required to be registered at the health centre servicing their resident subdistrict in order to receive health services.

### Data management

In Lao PDR and Mongolia, study staff are double-entering data using a RedCAP (Research Electronic Data Capture) and Microsoft Access (Microsoft Corporation) database, respectively. In PNG, data are checked by a monitor prior to being entered into Filemaker Pro (FileMaker Inc.). We are conducting regular double-entry discrepancy checks and logic checks using Stata Statistical Software (College Station, TX: StataCorp LLC).

### Analysis

All analyses will be completed using Stata Statistical Software (College Station, TX: StataCorp LLC). We will summarise continuous variables using mean and standard deviation (or median and interquartile range for non-symmetrical data). Categorical variables will be summarised using frequency counts and percentages.

1  
2  
3 Objective 1: Relationship between vaccine coverage and indirect effects

4 We want to investigate the relationship between VT carriage and density among under-vaccinated  
5 cases (indirect effects) and subdistrict/village PCV coverage. We will use an adaptation of a method  
6 used to estimate indirect protection for an oral cholera vaccine which exploits heterogeneities in  
7 vaccine coverage at the subdistrict/village level, comparing VT carriage and density among under-  
8 vaccinated children from subdistricts/villages with differing levels of vaccine coverage.<sup>33 34</sup>  
9  
10

11 This will be done using multivariable models with VT carriage or density in ARI cases as the outcome  
12 variable and PCV coverage at the child's place of residence at the time of admission as the exposure  
13 variable. We will use generalised estimating equations to account for clustering at the  
14 subdistrict/village level.  
15  
16

17 To identify confounders for adjustment, we will construct directed acyclic graphs (DAG). DAGs  
18 include all variables potentially related to exposure and outcome, connected using uni-directional  
19 arrows showing causal relationships between variables. The graph identifies potentially confounding  
20 pathways and allows investigators to determine variables that should be controlled for to obtain  
21 unbiased effect estimates. As there are likely to be unique confounders between sites, we will develop  
22 site-specific DAGs. We will use DAGitty.net (version 2.3) software to identify minimally sufficient  
23 confounding subsets for adjustment.  
24  
25  
26

27 For each site, we will construct a similar model using overall pneumococcal carriage as the  
28 dependent variable. This model will act as a bias indicator since PCV coverage is not expected to  
29 affect levels of overall pneumococcal carriage due to replacement carriage with NVTs, although  
30 complete replacement to baseline levels can take several years.<sup>21 35 36</sup> Therefore, we will restrict this  
31 analysis to the latter part of the study period, when descriptive analyses indicate the replacement is  
32 complete.  
33  
34  
35

36 To determine whether a higher PCV coverage is required to achieve indirect effects among  
37 completely un-vaccinated cases compared to under-vaccinated cases, we will conduct a sensitivity  
38 analysis among children who have never received PCV.  
39  
40

41 Objective 2: VT carriage prevalence among cases and contacts, by calendar month (PNG only)  
42 Crude and adjusted monthly VT carriage prevalence will be estimated within rolling seven-month  
43 intervals to present smooth curves and assess trends over time. This will be done separately for  
44 cases and contacts. To account for differences in age between cases and community contacts, the  
45 carriage prevalence will be adjusted using direct standardisation (standardised to the case population  
46 over the entire study period).  
47  
48

49 Objective 3: Relationship between vaccine coverage and indirect effects among community contacts  
50 (PNG only)  
51

52 To investigate whether relationship between vaccine coverage and indirect effects as observed  
53 among cases with ARI are reflective of the relationship between vaccine coverage and indirect effects  
54 in the wider community, we will apply the same model described above to under-vaccinated  
55 community contacts. We will construct multivariable models with VT carriage and density among  
56  
57  
58

1  
2  
3 under-vaccinated community contacts as the outcome variable and PCV coverage at the child's place  
4 of residence at the time of admission as the exposure variable. We will be using the same vaccine  
5 coverage data as for the cases.  
6

7 **Objective 4: Comparison of vaccine coverage required for indirect effects across sites**

8 We will compare differences in the PCV13 coverage required to demonstrate indirect effects of  
9 PCV13 qualitatively, by site and in relation to vaccine schedule and use of catch-up campaigns.  
10 Inferential statistics are unlikely to be suitable with the inclusion of only three sites and comparability  
11 between sites is limited due to variations between them.  
12  
13

#### 14 **Power calculation**

15 Power calculations were performed using nQuery Advisor + nTerim 4.0. Calculations were based on  
16 sample size methods for logistic regression models with a continuous covariate (i.e. PCV coverage)  
17 and additional covariates, with inflation to account for clustering within villages. Power calculations  
18 assumed VT carriage prevalence of 30% in Lao PDR and 40% in Mongolia and PNG at the mean  
19 PCV coverage level,<sup>37</sup> and VT carriage prevalence of 20% in Lao PDR and 30% in Mongolia and  
20 PNG at one standard deviation above the mean PCV coverage level. Assuming a significance level of  
21 0.05, allowing for adjustment using multiple covariates with an r-squared of 0.4, and that 50% of the  
22 cases are under-vaccinated, a sample size of 1200 cases per site would provide between 87% and  
23 92% power to determine the proportion of cases carrying VT pneumococcus at varying levels of  
24 village vaccine coverage. The power calculation has been adjusted to account for clustering by  
25 village, with higher variability in Lao PDR and PNG (intraclass coefficient [ICC] 0.1) and lower  
26 variability in Mongolia (ICC 0.01).  
27  
28  
29  
30  
31  
32

#### 33 **Missing data**

34 We will describe the number of participants with missing data on individual variables and compare the  
35 characteristics of those with and without missing data to determine whether there is evidence of  
36 systematic differences in characteristics. If there is evidence of systematic differences between those  
37 with and without missing data, we will consider using multiple imputation to predict the distribution of  
38 the missing data in order to account for the bias due to incomplete data.<sup>38</sup>  
39  
40  
41

#### 42 **Patient and Public Involvement**

43 Patients were not involved. Public health authorities in Laos and Mongolia were involved in the design  
44 and conduct of the study. In PNG, village representatives are approached to ensure that community  
45 surveys are conducted appropriately.  
46  
47

#### 48 **CURRENT STATUS OF THE STUDY**

49 Recruitment is ongoing and analysis of data, followed by publication of results, is expected from 2018  
50 onwards. As of August 2017, we have recruited 1039, 481 and 3847 cases from Lao PDR, PNG and  
51 Mongolia respectively. Table 4 describes the baseline characteristics of the children recruited.  
52  
53  
54  
55  
56  
57  
58  
59  
60

Table 4: Case characteristics by site, Lao People's Democratic Republic (PDR), Mongolia and Papua New Guinea (PNG), 2014-2017

|                     |              | Lao PDR<br>n=1039<br>n (%) | Mongolia<br>n=3847<br>n (%) | PNG<br>n=481<br>n (%) |
|---------------------|--------------|----------------------------|-----------------------------|-----------------------|
| Year of recruitment | 2014         | 365/1039 (35)              | NA                          | NA                    |
|                     | 2015         | 323/1039 (31)              | 885/3847 (23)               | NA                    |
|                     | 2016         | 281/1039 (27)              | 2007/3847 (52)              | 190/481 (40)          |
|                     | 2017         | 70/1039 (7)                | 955/3847 (25)               | 291/481 (60)          |
| Age group           | < 12 months  | 432/1038 (42)              | 1481/3847 (39)              | 258/481 (54)          |
|                     | 12-23 months | 346/1038 (33)              | 1250/3847 (32)              | 123/481 (25)          |
|                     | >=24 months  | 260/1038 (25)              | 1116/3847 (29)              | 100/481 (21)          |
| Gender              | Male         | 591/1039 (57)              | 2079/3847 (54)              | 278/481 (58)          |

## ETHICS AND DISSEMINATION

Prospective participants will be fully informed about the potential risks and benefits of participation and written informed consent will be obtained prior to recruitment. The study is being conducted according to protocols approved by the following ethics committees: Lao PDR Ministry of Health National Ethics Committee for Health Research (057/2013 NECHR), Oxford Tropical Research Ethics Committee (1050-13), Mongolian National Ethics Committee for Health Research, the WHO Regional Office for the Western Pacific (WPRO) Ethics Review Committee (2013.30.LAO.2.EPI), PNG IMR Institutional Review Board (1510), Government of PNG Medical Research Advisory Committee (15.18), and the Royal Children's Hospital/MCRI Human Research Ethics Committee (33177B, 33203E).

We plan on disseminating results to relevant stakeholders within Lao PDR, PNG and Mongolia, as well as submitting our findings for publication in relevant peer-reviewed journals and conferences.

## DISCUSSION

The ability for low- and middle-income countries to monitor the indirect effects of PCV is critical. Maximising indirect effects is important because these effects comprise a substantial proportion of overall PCV impact and increase the cost-effectiveness of the vaccine.<sup>39</sup> Indirect protection is particularly important for individuals who are unable to be vaccinated or who have poor vaccine responses, such as infants too young to be vaccinated and the elderly. In addition, the Bill & Melinda Gates Foundation are supporting studies looking into the effectiveness of reduced dose schedules (1+1). This reduced dose schedule needs to maintain indirect effects following PCV introduction and this surveillance method provides a mechanism to determine when herd protection has been

1  
2  
3 achieved and whether it is maintained.<sup>40</sup> Furthermore, the ability to determine whether substantial  
4 herd immunity has been achieved may help to identify settings which are appropriate for introduction  
5 of reduced dose or modified schedules.  
6

7  
8 The results of our study will address the scarcity of literature determining the PCV coverage required  
9 to achieve substantial indirect effects, especially in low- and middle-income countries. The inclusion of  
10 three sites, which have contrasting vaccine schedules, baseline intensities of pneumococcal carriage  
11 and health-care systems, will also enable us to determine whether this vaccine coverage threshold  
12 differs by site and explore factors which may modify the vaccine coverage required to achieve indirect  
13 effects.  
14  
15

16  
17 In this proposal, we describe a novel application of an analysis method to measure indirect effects.  
18 Although the isolation of a particular pneumococcal serotype from the nasopharynx of a child with ARI  
19 is not necessarily indicative of the serotype causing pneumococcal disease, reduced detection of VT  
20 pneumococci is likely to reflect reductions in disease due to VT pneumococci. Furthermore, our  
21 proposed analysis methods enable estimation of indirect effects in the absence of baseline pre-PCV  
22 data. This will be relevant for many low- and middle-income countries that have little or no baseline  
23 data and are considering options for surveillance to accompany the introduction of PCV.  
24  
25

26  
27 Another key strength of our methods is the use of consistent molecular serotyping microarray  
28 methods across all three sites, enabling sensitive detection of multiple serotype carriage and  
29 ascertainment of serotype-specific density.<sup>29</sup> Conventional pneumococcal carriage studies typically  
30 detect the presence of a single serotype and may overlook the presence of vaccine serotypes  
31 occurring at lower densities. The results of this study will also add to the limited literature on the  
32 effects of PCV on vaccine-type carriage density, which may affect likelihood of transmission.<sup>41</sup>  
33  
34

35  
36 Our proposed methods have several potential limitations. Firstly, there are significant challenges in  
37 determining accurate estimates of PCV coverage in resource-limited settings. In Mongolia and Lao  
38 PDR, where we are using administrative data, our estimates rely on the availability of accurate data  
39 about vaccine doses administered (numerator) as well as population estimates for the target age  
40 group (denominator). In both settings, we are conducting audits to assess the reliability of numerator  
41 data. Regarding denominator data, we are fortunate that a recent population census was conducted  
42 in Lao PDR in March 2015. However, we will be auditing denominator data in Mongolia, where  
43 population estimates are affected by large seasonal population movements between rural and urban  
44 settings. In PNG, the validity of the community surveys depends on representative sampling. However  
45 survey participation can vary and is affected by season (related to farming practices), as well as  
46 community trust and understanding of the study. To maximise participation, we conducted mobile  
47 health clinics alongside the community surveys.  
48  
49  
50

51  
52 The second main limitation relates to detecting pneumococcal carriage in our study population of  
53 children hospitalised with respiratory infection. In this population, carriage detection may be affected  
54 by the prior use of antibiotics.<sup>42 43</sup> To address this, we have, where possible, aimed to recruit patients  
55  
56  
57  
58  
59  
60

1  
2  
3 at admission, prior to receiving antibiotics or documented prior antibiotic use, which will be taken into  
4 account during analysis.  
5

6 Thirdly, there are variations in methods and setting across the three sites. This limitation may impact  
7 on the comparability of our results across the three sites. The reason for the differences in methods  
8 between sites is that our study is built on pre-existing studies (pneumonia aetiology studies in Lao  
9 PDR and PNG, and a vaccine impact study in Mongolia) with established protocols.  
10

11  
12 To conclude, the results of this study will provide important feedback to national policy makers about  
13 the effects of newly introduced PCV programs in Lao PDR, Mongolia, and PNG. The results will help  
14 us understand the determinants of indirect effects and therefore guide strategies to maximise them. In  
15 particular, the results will also inform global policy about the vaccine coverage required to achieve  
16 substantial indirect effects in settings with different epidemiological characteristics of pneumococcal  
17 disease and carriage and will maximise the cost-effectiveness of the vaccine programs.  
18  
19

#### 20 21 **Acknowledgements:**

22 We would like to acknowledge the Ministries of Health of Lao PDR and Mongolia, LOMWRU, PNG  
23 IMR and WHO and support from the Victorian Government's Operational Infrastructure Support  
24 Program. We would also like to thank study staff, laboratory staff and participating families.  
25  
26

27 The PneuCAPTIVE protocol development group includes the authors of the paper listed in the by-line  
28 and the following: Dashtseren Luvsantseren (NCCD, Ulaanbaatar, Mongolia), Bujinlkham (NCCD,  
29 Ulaanbaatar, Mongolia), Mukhchuluun Ulziibayar (NCCD, Ulaanbaatar, Mongolia), Dashpagam  
30 (NCCD, Ulaanbaatar, Mongolia), Audrey Dubot-Pérès (LOMHWRU, Vientiane, Lao PDR),  
31 Keodomphone Vilavong (LOMHWRU, Vientiane, Lao PDR), Anisone Chanthongthip (LOMHWRU,  
32 Vientiane, Lao PDR), Syladeth Chanthaphone (LOMHWRU, Vientiane, Lao PDR), Joycelyn Sapura  
33 (PNG IMR, Goroka, PNG), John Kave (PNG IMR, Goroka, PNG), Tonny Kumani (PNG IMR, Goroka,  
34 PNG), Wendy Kirarock (PNG IMR, Goroka, PNG).  
35  
36  
37  
38

39 **Author's contributions:** FR conceived the idea and designed the study. JL, SD, KF, PN, RL, RP,  
40 AX, DD and FR supported the development of country-specific protocols and study implementation in  
41 Lao PDR. CCB, RF, DL, WP and FR supported the development of country-specific protocols and  
42 study implementation in PNG. TM, SLV, CVM, KM, JC and FR supported the development of  
43 country-specific protocols and study implementation in Mongolia. CS, ED and JH devised the  
44 microbiological approach and laboratory protocols. JC, CN, RA, and FR devised the analysis plan. JC  
45 and FR drafted the manuscript. All authors provided feedback to the draft manuscript and have read  
46 and approved the final version.  
47  
48  
49

50 **Funding statement:** This work is supported by the Bill & Melinda Gates Foundation grant number  
51 (OPP1115490). JC is completing a PhD at The University of Melbourne, funded by an Australian  
52 Government Research Training Program scholarship.  
53  
54

55 **Competing interests:** None declared.  
56  
57  
58  
59  
60

## REFERENCES

1. Wang H, Bhutta ZA, Coates MM, et al. Global, regional, national, and selected subnational levels of stillbirths, neonatal, infant, and under-5 mortality 1980-2015: a systematic analysis for the Global Burden of Disease Study 2015. *The Lancet* 2016;388(10053):1725-74. doi: 10.1016/S0140-6736(16)31575-6
2. Hill PC, Townend J, Antonio M, et al. Transmission of *Streptococcus pneumoniae* in rural Gambian villages: a longitudinal study. *Clinical Infectious Diseases* 2010;50(11):1468-76. doi: <http://dx.doi.org/10.1086/652443>
3. Hussain M, Melegaro A, Pebody RG, et al. A longitudinal household study of *Streptococcus pneumoniae* nasopharyngeal carriage in a UK setting. *Epidemiology and Infection* 2005;133(5):891-98. doi: <http://dx.doi.org/10.1017/S0950268805004012>
4. Gray BM, Converse GM, 3rd, Dillon HC, Jr. Epidemiologic studies of *Streptococcus pneumoniae* in infants: acquisition, carriage, and infection during the first 24 months of life. *The Journal of infectious diseases* 1980;142(6):923-33. [published Online First: 1980/12/01]
5. Varon E, Cohen R, Bechet S, et al. Invasive disease potential of pneumococci before and after the 13-valent pneumococcal conjugate vaccine implementation in children. *Vaccine* 2015;33(46):6178-85.
6. Johnson HL, Deloria-Knoll M, Levine OS, et al. Systematic evaluation of serotypes causing invasive pneumococcal disease among children under five: the pneumococcal global serotype project. *PLoS Med* 2010;7(10) doi: 10.1371/journal.pmed.1000348 [published Online First: 2010/10/20]
7. Loo JD, Conklin L, Fleming-Dutra KE, et al. Systematic review of the effect of pneumococcal conjugate vaccine dosing schedules on prevention of pneumonia. *The Pediatric infectious disease journal* 2014;33 Suppl 2:S140-51. doi: 10.1097/inf.0000000000000082 [published Online First: 2013/12/18]
8. Conklin L, Loo JD, Kirk J, et al. Systematic review of the effect of pneumococcal conjugate vaccine dosing schedules on vaccine-type invasive pneumococcal disease among young children. *The Pediatric infectious disease journal* 2014;33 Suppl 2:S109-18. doi: 10.1097/inf.0000000000000078 [published Online First: 2013/12/18]
9. Le Saux N. Pneumococcal conjugate vaccines for preventing otitis media. *Paediatrics & Child Health* 2016;21(2):89-90.
10. Loo JD, Conklin L, Fleming-Dutra KE, et al. Systematic review of the indirect effect of pneumococcal conjugate vaccine dosing schedules on pneumococcal disease and colonization. *Pediatric Infectious Disease Journal* 2014;33 Suppl 2:S161-71.
11. Direct and indirect effects of routine vaccination of children with 7-valent pneumococcal conjugate vaccine on incidence of invasive pneumococcal disease--United States, 1998-2003. *MMWR Morbidity and mortality weekly report* 2005;54(36):893-7. [published Online First: 2005/09/16]
12. Tsaban G, Ben-Shimol S. Indirect (herd) protection, following pneumococcal conjugated vaccines introduction: A systematic review of the literature. *Vaccine* 2017;35(22):2882-91. doi: 10.1016/j.vaccine.2017.04.032 [published Online First: 2017/04/30]
13. Loughlin AM, Hsu K, Silverio AL, et al. Direct and indirect effects of PCV13 on nasopharyngeal carriage of PCV13 unique pneumococcal serotypes in Massachusetts' children. *The Pediatric infectious disease journal* 2014;33(5):504-10. doi: 10.1097/inf.0000000000000279 [published Online First: 2014/03/29]
14. Grant LR, Hammitt LL, O'Brien SE, et al. Impact of the 13-valent pneumococcal conjugate vaccine on pneumococcal carriage among American Indians. *The Pediatric infectious disease journal* 2016;35(8):907-14. doi: 10.1097/inf.0000000000001207 [published Online First: 2016/05/14]



- 1  
2  
3 15. International Vaccine Access Center - John Hopkins Bloomberg School of Public Health. VIEW-  
4 hub 2016 [accessed 17/12/2016].
- 5  
6 16. Shiri T, Datta S, Madan J, et al. Indirect effects of childhood pneumococcal conjugate vaccination  
7 on invasive pneumococcal disease: a systematic review and meta-analysis. *The Lancet Global Health*  
8 2017;5(1):e51-e59. doi: 10.1016/s2214-109x(16)30306-0
- 9  
10 17. Jayasinghe S, Menzies R, Chiu C, et al. Long-term impact of a “3+0” schedule for 7 and 13 valent  
11 pneumococcal conjugate vaccines on invasive pneumococcal disease in Australia, 2002-2014.  
12 *Clinical Infectious Diseases* 2016 doi: 10.1093/cid/ciw720
- 13  
14 18. Mackenzie GA, Hill PC, Jeffries DJ, et al. Effect of the introduction of pneumococcal conjugate  
15 vaccination on invasive pneumococcal disease in The Gambia: a population-based surveillance  
16 study. *The Lancet Infectious diseases* 2016;16(6):703-11. doi: 10.1016/s1473-3099(16)00054-2  
17 [published Online First: 2016/02/22]
- 18  
19 19. von Gottberg A, de Gouveia L, Tempia S, et al. Effects of vaccination on invasive pneumococcal  
20 disease in South Africa. *The New England journal of medicine* 2014;371(20):1889-99. doi:  
21 10.1056/NEJMoa1401914 [published Online First: 2014/11/12]
- 22  
23 20. Rodgers GL, Klugman KP. Surveillance of the impact of pneumococcal conjugate vaccines in  
24 developing countries. *Human Vaccines and Immunotherapeutics* 2016;12(2):417-20. doi:  
25 <http://dx.doi.org/10.1080/21645515.2015.1057671>
- 26  
27 21. Gladstone RA, Jefferies JM, Tocheva AS, et al. Five winters of pneumococcal serotype  
28 replacement in UK carriage following PCV introduction. *Vaccine* 2015;33(17):2015-21.
- 29  
30 22. Dunne EM, Manning J, Russell FM, et al. Effect of pneumococcal vaccination on nasopharyngeal  
31 carriage of *Streptococcus pneumoniae*, *Haemophilus influenzae*, *Moraxella catarrhalis*, and  
32 *Staphylococcus aureus* in Fijian children. *J Clin Microbiol* 2012;50(3):1034-8. doi: 10.1128/jcm.06589-  
33 11 [published Online First: 2011/12/16]
- 34  
35 23. Mosser JF, Grant LR, Millar EV, et al. Nasopharyngeal carriage and transmission of  
36 *Streptococcus pneumoniae* in American Indian households after a decade of pneumococcal  
37 conjugate vaccine use. [Erratum appears in PLoS One. 2014;9(3):e93878]. *PLoS ONE [Electronic*  
38 *Resource]* 2014;9(1):e79578.
- 39  
40 24. Lehmann D, Gratten M, Montgomery J. Susceptibility of pneumococcal carriage isolates to  
41 penicillin provides a conservative estimate of susceptibility of invasive pneumococci. *The Pediatric*  
42 *infectious disease journal* 1997;16(3):297-305. [published Online First: 1997/03/01]
- 43  
44 25. Nguyen VH, Dubot-Peres A, Russell FM, et al. Acute respiratory infections in hospitalized children  
45 in Vientiane, Lao PDR - the importance of Respiratory Syncytial Virus. *Scientific reports*  
46 2017;7(1):9318. doi: 10.1038/s41598-017-09006-6 [published Online First: 2017/08/26]
- 47  
48 26. Blyth CC, Ford R, Sapura J, et al. Childhood pneumonia and meningitis in the Eastern Highlands  
49 Province, Papua New Guinea in the era of conjugate vaccines: study methods and challenges.  
50 *Pneumonia (Nathan Qld)* 2017;9:5. doi: 10.1186/s41479-017-0029-y [published Online First:  
51 2017/07/14]
- 52  
53 27. Satzke C, Turner P, Virolainen-Julkunen A, et al. Standard method for detecting upper respiratory  
54 carriage of *Streptococcus pneumoniae*: updated recommendations from the World Health  
55 Organization Pneumococcal Carriage Working Group. *Vaccine* 2013;32(1):165-79. doi:  
56 10.1016/j.vaccine.2013.08.062 [published Online First: 2013/12/18]
- 57  
58 28. Dunne EM, Manning J, Russell FM, et al. Effect of Pneumococcal Vaccination on Nasopharyngeal  
59 Carriage of *Streptococcus pneumoniae*, *Haemophilus influenzae*, *Moraxella catarrhalis*, and  
60 *Staphylococcus aureus* in Fijian Children. *Journal of Clinical Microbiology* 2012;50(3):1034-38. doi:  
10.1128/JCM.06589-11

- 1  
2  
3 29. Satzke C, Dunne EM, Porter BD, et al. The PneuCarriage Project: A Multi-Centre Comparative  
4 Study to Identify the Best Serotyping Methods for Examining Pneumococcal Carriage in Vaccine  
5 Evaluation Studies. *PLoS Medicine / Public Library of Science* 2015;12(11):e1001903; discussion  
6 e03.
- 7 30. Newton R, Hinds J, Wernisch L. Empirical Bayesian models for analysing molecular serotyping  
8 microarrays. *BMC bioinformatics* 2011;12:88. doi: 10.1186/1471-2105-12-88 [published Online First:  
9 2011/04/02]
- 10 31. Scott P, Rutjes AW, Bermetz L, et al. Comparing pneumococcal conjugate vaccine schedules  
11 based on 3 and 2 primary doses: systematic review and meta-analysis. *Vaccine* 2011;29(52):9711-  
12 21. doi: 10.1016/j.vaccine.2011.07.042 [published Online First: 2011/08/09]
- 13 32. Chan J. High agreement between the new Mongolian electronic immunisation register and clinic  
14 immunisation records: a health centre based audit. *Western Pacific Surveillance and Response*  
15 *Journal* 2017;In press
- 16 33. Deen J, Ali M, Sack D. Methods to assess the impact of mass oral cholera vaccination campaigns  
17 under real field conditions. *PLoS ONE* 2014;9(2):e88139. doi: 10.1371/journal.pone.0088139
- 18 34. Khatib AM, Ali M, von Seidlein L, et al. Effectiveness of an oral cholera vaccine in Zanzibar:  
19 findings from a mass vaccination campaign and observational cohort study. *The Lancet Infectious*  
20 *diseases* 2012;12(11):837-44. doi: 10.1016/s1473-3099(12)70196-2 [published Online First:  
21 2012/09/08]
- 22 35. Moore MR, Hyde TB, Hennessy TW, et al. Impact of a conjugate vaccine on community-wide  
23 carriage of nonsusceptible *Streptococcus pneumoniae* in Alaska. *Journal of Infectious Diseases*  
24 2004;190(11):2031-8.
- 25 36. Usuf E, Bottomley C, Adegbola RA, et al. Pneumococcal carriage in sub-Saharan Africa - A  
26 systematic review. *PLoS ONE* 2014;9 (1) (no pagination)(e85001) doi:  
27 <http://dx.doi.org/10.1371/journal.pone.0085001>
- 28 37. Aho C, Michael A, Yoannes M, et al. Limited impact of neonatal or early infant schedules of 7-  
29 valent pneumococcal conjugate vaccination on nasopharyngeal carriage of *Streptococcus*  
30 *pneumoniae* in Papua New Guinean children: A randomized controlled trial. *Vaccine Reports*  
31 2016;6:36-43. doi: <http://dx.doi.org/10.1016/j.vacrep.2016.08.002>
- 32 38. Sterne JAC, White IR, Carlin JB, et al. Multiple imputation for missing data in epidemiological and  
33 clinical research: potential and pitfalls. *Bmj* 2009;338 doi: 10.1136/bmj.b2393
- 34 39. Isaacman DJ, Strutton DR, Kalpas EA, et al. The impact of indirect (herd) protection on the cost-  
35 effectiveness of pneumococcal conjugate vaccine. *Clinical therapeutics* 2008;30(2):341-57. doi:  
36 10.1016/j.clinthera.2008.02.003 [published Online First: 2008/03/18]
- 37 40. Rodgers GL, Klugman KP. A new paradigm in pneumococcal conjugate vaccination: moving from  
38 individual to herd protection. *International journal of infectious diseases : IJID : official publication of*  
39 *the International Society for Infectious Diseases* 2017 doi: 10.1016/j.ijid.2017.04.015
- 40 41. Roca A, Bottomley C, Hill PC, et al. Effect of age and vaccination with a pneumococcal conjugate  
41 vaccine on the density of pneumococcal nasopharyngeal carriage. *Clinical Infectious Diseases*  
42 2012;55(6):816-24.
- 43 42. Abdullahi O, Karani A, Tigoi CC, et al. The prevalence and risk factors for pneumococcal  
44 colonization of the nasopharynx among children in Kilifi District, Kenya. *PLoS One* 2012;7(2):e30787.  
45 doi: 10.1371/journal.pone.0030787 [published Online First: 2012/03/01]
- 46 43. Alpkvist H, Athlin S, Naucner P, et al. Clinical and Microbiological Factors Associated with High  
47 Nasopharyngeal Pneumococcal Density in Patients with Pneumococcal Pneumonia. *PLoS One*  
48 2015;10(10):e0140112. doi: 10.1371/journal.pone.0140112 [published Online First: 2015/10/16]

1  
2  
3  
4  
5  
6  
7  
8  
9  
10  
11  
12  
13  
14  
15  
16  
17  
18  
19  
20  
21  
22  
23  
24  
25  
26  
27  
28  
29  
30  
31  
32  
33  
34  
35  
36  
37  
38  
39  
40  
41  
42  
43  
44  
45  
46  
47  
48  
49  
50  
51  
52  
53  
54  
55  
56  
57  
58  
59  
60

For peer review only

# BMJ Open

## Determining the pneumococcal conjugate vaccine coverage required for indirect protection against vaccine-type pneumococcal carriage in low- and middle-income countries: a protocol for a prospective observational study

|                               |                                                                                                                                                                                                                                                                                                                                                                                                                                                                                                                                                                                                                                                                                                                                                                                                                                                                                                                                                                                                                                                                                                                                                                                                                                                                                                                                                                                                                                                                                                                                                                                                                                                                                                                                                                                                                                                                                                                                                                                                                                                                                                                                                                                                                                                                                                                                                                                                                                                                                                              |
|-------------------------------|--------------------------------------------------------------------------------------------------------------------------------------------------------------------------------------------------------------------------------------------------------------------------------------------------------------------------------------------------------------------------------------------------------------------------------------------------------------------------------------------------------------------------------------------------------------------------------------------------------------------------------------------------------------------------------------------------------------------------------------------------------------------------------------------------------------------------------------------------------------------------------------------------------------------------------------------------------------------------------------------------------------------------------------------------------------------------------------------------------------------------------------------------------------------------------------------------------------------------------------------------------------------------------------------------------------------------------------------------------------------------------------------------------------------------------------------------------------------------------------------------------------------------------------------------------------------------------------------------------------------------------------------------------------------------------------------------------------------------------------------------------------------------------------------------------------------------------------------------------------------------------------------------------------------------------------------------------------------------------------------------------------------------------------------------------------------------------------------------------------------------------------------------------------------------------------------------------------------------------------------------------------------------------------------------------------------------------------------------------------------------------------------------------------------------------------------------------------------------------------------------------------|
| Journal:                      | <i>BMJ Open</i>                                                                                                                                                                                                                                                                                                                                                                                                                                                                                                                                                                                                                                                                                                                                                                                                                                                                                                                                                                                                                                                                                                                                                                                                                                                                                                                                                                                                                                                                                                                                                                                                                                                                                                                                                                                                                                                                                                                                                                                                                                                                                                                                                                                                                                                                                                                                                                                                                                                                                              |
| Manuscript ID                 | bmjopen-2018-021512.R2                                                                                                                                                                                                                                                                                                                                                                                                                                                                                                                                                                                                                                                                                                                                                                                                                                                                                                                                                                                                                                                                                                                                                                                                                                                                                                                                                                                                                                                                                                                                                                                                                                                                                                                                                                                                                                                                                                                                                                                                                                                                                                                                                                                                                                                                                                                                                                                                                                                                                       |
| Article Type:                 | Protocol                                                                                                                                                                                                                                                                                                                                                                                                                                                                                                                                                                                                                                                                                                                                                                                                                                                                                                                                                                                                                                                                                                                                                                                                                                                                                                                                                                                                                                                                                                                                                                                                                                                                                                                                                                                                                                                                                                                                                                                                                                                                                                                                                                                                                                                                                                                                                                                                                                                                                                     |
| Date Submitted by the Author: | 29-Mar-2018                                                                                                                                                                                                                                                                                                                                                                                                                                                                                                                                                                                                                                                                                                                                                                                                                                                                                                                                                                                                                                                                                                                                                                                                                                                                                                                                                                                                                                                                                                                                                                                                                                                                                                                                                                                                                                                                                                                                                                                                                                                                                                                                                                                                                                                                                                                                                                                                                                                                                                  |
| Complete List of Authors:     | <p>Chan, Jocelyn; Murdoch Childrens Research Institute, Pneumococcal Research Group; The University of Melbourne, Department of Paediatrics<br/>         Nguyen, Cattram; Murdoch Childrens Research Institute, Pneumococcal Research; The University of Melbourne, Department of Paediatrics<br/>         Lai, Jana; Murdoch Childrens Research Institute, Pneumococcal Research Group<br/>         Dunne, Eileen; Murdoch Childrens Research Institute, Pneumococcal Research Group; The University of Melbourne, Department of Paediatrics<br/>         Andrews, Ross; Menzies School of Health Research, Charles Darwin University, Global &amp; Tropical Health Division; Australian National University, National Centre for Epidemiology &amp; Population Health<br/>         Blyth, Christopher C.; University of Western Australia, School of Medicine; Princess Margaret Hospital for Children, Department of Infectious Diseases<br/>         Datta, Siddhartha; World Health Organization<br/>         Fox, Kim; World Health Organization, Regional Office for the Western Pacific<br/>         Ford, Rebecca ; Papua New Guinea Institute of Medical Research<br/>         Hinds, Jason; St George's- University of London, Institute for Infection and Immunity; London Bioscience Innovation Centre, BUGS Bioscience<br/>         La Vincente, Sophie; Murdoch Childrens Research Institute, Pneumococcal Research Group<br/>         Lehmann, Deborah; Telethon Kids Institute, University of Western Australia, Wesfarmers Centre for Vaccines and Infectious Diseases<br/>         Lim, Ruth; Murdoch Childrens Research Institute, Pneumococcal Research Group<br/>         Mungun, Tuya ; Ministry of Health, National Center of Communicable Diseases (NCCD)<br/>         Newton, Paul ; Lao-Oxford-Mahosot Hospital-Wellcome Trust Research Unit , Microbiology Laboratory, Mahosot Hospital; University of Oxford, Centre for Tropical Medicine and Global Health<br/>         Phetsouvanh, Rattanaphone; Lao-Oxford-Mahosot Hospital-Wellcome Trust Research Unit, Microbiology Laboratory, Mahosot Hospital; University of Oxford, Centre for Tropical Medicine and Global Health<br/>         Pomat, Willie; PNG Institute of Medical Research, Infection and Immunity; Telethon Kids Institute, University of Western Australia, Wesfarmers Centre for Vaccines and Infectious Diseases<br/>         Xeuatvongsa, Anonh; Ministry of Health, National Immunization Programme</p> |

|                                                    |                                                                                                                                                                                                                                                                                                                                                                                                                                                                                                                                                                                                                                                                                                                                                                                                                                                                                                                                                                  |
|----------------------------------------------------|------------------------------------------------------------------------------------------------------------------------------------------------------------------------------------------------------------------------------------------------------------------------------------------------------------------------------------------------------------------------------------------------------------------------------------------------------------------------------------------------------------------------------------------------------------------------------------------------------------------------------------------------------------------------------------------------------------------------------------------------------------------------------------------------------------------------------------------------------------------------------------------------------------------------------------------------------------------|
|                                                    | <p>von Mollendorf, Claire; Murdoch Childrens Research Institute, Pneumococcal Research Group; The University of Melbourne, Department of Paediatrics</p> <p>Dance, David; Lao-Oxford-Mahosot Hospital-Wellcome Trust Research Unit, Microbiology Laboratory, Mahosot Hospital; University of Oxford, Centre for Tropical Medicine and Global Health</p> <p>Satzke, Catherine; Murdoch Childrens Research Institute, Pneumococcal Research; The University of Melbourne at the Peter Doherty Institute for Infection and Immunity, Department of Microbiology and Immunology</p> <p>Muholland , Kim; Murdoch Childrens Research Institute, Pneumococcal Research Group; London School of Hygiene and Tropical Medicine, Department of Infectious Disease Epidemiology</p> <p>Russell, F. M.; Murdoch Childrens Research Institute, Pneumococcal Research Group; The University of Melbourne, Centre for International Child Health, Department of Paediatrics</p> |
| <b>&lt;b&gt;Primary Subject Heading&lt;/b&gt;:</b> | Global health                                                                                                                                                                                                                                                                                                                                                                                                                                                                                                                                                                                                                                                                                                                                                                                                                                                                                                                                                    |
| Secondary Subject Heading:                         | Infectious diseases, Epidemiology                                                                                                                                                                                                                                                                                                                                                                                                                                                                                                                                                                                                                                                                                                                                                                                                                                                                                                                                |
| Keywords:                                          | Public health < INFECTIOUS DISEASES, Paediatric infectious disease & immunisation < PAEDIATRICS, Respiratory infections < THORACIC MEDICINE                                                                                                                                                                                                                                                                                                                                                                                                                                                                                                                                                                                                                                                                                                                                                                                                                      |
|                                                    |                                                                                                                                                                                                                                                                                                                                                                                                                                                                                                                                                                                                                                                                                                                                                                                                                                                                                                                                                                  |

SCHOLARONE™  
Manuscripts

view only

1  
2  
3  
4 **DETERMINING THE PNEUMOCOCCAL CONJUGATE VACCINE COVERAGE REQUIRED FOR**  
5 **INDIRECT PROTECTION AGAINST VACCINE-TYPE PNEUMOCOCCAL CARRIAGE IN LOW-**  
6 **AND MIDDLE-INCOME COUNTRIES: A PROTOCOL FOR A PROSPECTIVE OBSERVATIONAL**  
7 **STUDY**

8 **Authors:**

9  
10  
11 Chan J<sup>1,2</sup>, Nguyen CD<sup>1,2</sup>, Lai JYR<sup>1</sup>, Dunne EM<sup>1,2</sup>, Andrews R<sup>3,4</sup>, Blyth CC<sup>5,6</sup>, Datta S<sup>7</sup>, Fox K<sup>8</sup>, Ford  
12 R<sup>9</sup>, Hinds J<sup>10,11</sup>, La Vincente S<sup>1</sup>, Lehmann D<sup>12</sup>, Lim R<sup>1</sup>, Mungun T<sup>13</sup>, Newton PN<sup>14,15</sup>, Phetsouvanh  
13 R<sup>14,15\*</sup>, Pomat W<sup>9,12</sup>, Xeuatvongsa A<sup>16</sup>, von Mollendorf C<sup>1,2</sup>, Dance DAB<sup>14,15</sup> Satzke C<sup>1,17</sup>, Mulholland  
14 K<sup>1,18</sup>, Russell FM<sup>1,19</sup> for the PneuCAPTIVE Protocol Group

- 17 1. Pneumococcal Research Group, Murdoch Children's Research Institute, Melbourne,  
18 Australia.
- 19 2. Department of Paediatrics, The University of Melbourne, Melbourne, Australia.
- 20 3. Global & Tropical Health Division, Menzies School of Health Research, Charles Darwin  
21 University, Darwin, Australia.
- 22 4. National Centre for Epidemiology & Population Health, Australian National University,  
23 Canberra, Australia
- 24 5. University of Western Australia, School of Medicine, Perth, Australia;
- 25 6. Department of Infectious Diseases, Princess Margaret Hospital, Perth, Australia;
- 26 7. World Health Organization, Vientiane, Lao People's Democratic Republic
- 27 8. Regional Office for the Western Pacific, World Health Organization, Manila, Philippines.
- 28 9. Papua New Guinea Institute of Medical Research, Infection and Immunity Unit, Goroka,  
29 Papua New Guinea.
- 30 10. Institute for Infection and Immunity, St George's- University of London, London, United  
31 Kingdom.
- 32 11. BUGS Bioscience, London Bioscience Innovation Centre, London, United Kingdom.
- 33 12. Wesfarmers Centre for Vaccines and Infectious Diseases, Telethon Kids Institute, University  
34 of Western Australia, Perth, Australia.
- 35 13. National Center of Communicable Diseases (NCCD), Ministry of Health, Ulaanbaatar,  
36 Mongolia.
- 37 14. Lao-Oxford-Mahosot Hospital-Wellcome Trust Research Unit (LOMHWRU), Microbiology  
38 Laboratory, Mahosot Hospital, Vientiane, Lao PDR.
- 39 15. Centre for Tropical Medicine and Global Health, University of Oxford, Oxford, United  
40 Kingdom.
- 41 16. National Immunization Programme, Ministry of Health, Vientiane, Lao PDR.
- 42 17. Department of Microbiology and Immunology, The University of Melbourne at the Peter  
43 Doherty Institute for Infection and Immunity, Melbourne, Australia
- 44 18. Department of Infectious Disease Epidemiology, London School of Hygiene and Tropical  
45 Medicine, London, United Kingdom.
- 46  
47  
48  
49  
50  
51  
52  
53  
54  
55  
56  
57  
58  
59  
60

1  
2  
3 19. Centre for International Child Health, Department of Paediatrics, The University of Melbourne,  
4 Melbourne, Australia.  
5

6  
7 \*Deceased  
8  
9

10 Corresponding author: Jocelyn Chan

11  
12 Pneumococcal Research Group,  
13 Murdoch Children's Research Institute  
14 50 Flemington Road, Parkville 3052 VIC  
15  
16 Australia  
17

18  
19 Email: [jocelyn.chan@mcri.edu.au](mailto:jocelyn.chan@mcri.edu.au)  
20

21 Telephone: +61 3 9345 4968  
22  
23  
24  
25  
26  
27  
28  
29  
30  
31  
32  
33  
34  
35  
36  
37  
38  
39  
40  
41  
42  
43  
44  
45  
46  
47  
48  
49  
50  
51  
52  
53  
54  
55  
56  
57  
58  
59  
60

## ABSTRACT

### Introduction

Pneumococcal conjugate vaccines (PCVs) prevent disease through both direct protection of vaccinated individuals, and indirect protection of unvaccinated individuals by reducing nasopharyngeal (NP) carriage and transmission of vaccine-type (VT) pneumococci. While the indirect effects of PCV vaccination are well described, the PCV coverage required to achieve the indirect effects is unknown. We will investigate the relationship between PCV coverage and vaccine-type carriage among under-vaccinated children using hospital-based NP pneumococcal carriage surveillance at three sites in the Asia-Pacific region.

### Methods and analysis

We are recruiting cases, defined as children aged 2-59 months admitted to participating hospitals with acute respiratory infection in Lao People's Democratic Republic, Mongolia and Papua New Guinea. Thirteen-valent PCV (PCV13) status is obtained from written records. NP swabs are collected according to standard methods, screened using *lytA* qPCR and serotyped by microarray. Village-level vaccination coverage, for the resident communities of the recruited cases, is determined using administrative data or community survey. Our analysis will investigate the relationship between VT carriage among under-vaccinated cases (indirect effects) and vaccine coverage using generalised estimating equations.

### Ethics and dissemination

Ethical approval has been obtained from the relevant ethics committees at participating sites. The results are intended for publication in open-access peer-reviewed journals and will demonstrate methods suitable for low- and middle-income countries to monitor vaccine impact, and inform vaccine policy makers about the PCV coverage required to achieve indirect protection.

### STRENGTHS AND LIMITATIONS

- We describe a novel application of study methods that enable monitoring the indirect effects of pneumococcal conjugate vaccines (PVCs) using pneumococcal carriage and in the absence of baseline data
- The methods do not measure indirect protection against disease. However, a reduction in VT carriage among undervaccinated cases suggests likely reductions in VT disease, since carriage is a precursor for disease. The use of molecular serotyping microarray enables detection of multiple serotype carriage and serotype-specific carriage density
- The inclusion of three sites, which have contrasting vaccine schedules and pneumococcal epidemiology, will enable us to explore factors which may modify the vaccine coverage required to achieve indirect effects however variations in methods and settings may impact on the comparability of our results across the three sites



## INTRODUCTION

Infections due to *Streptococcus pneumoniae* (the pneumococcus), including pneumonia, meningitis and septicaemia, are a leading cause of morbidity and mortality among children and elderly, especially in low- and middle-income countries.<sup>1</sup> The main reservoir for the pneumococcus is the human nasopharynx. Pneumococcal carriage peaks in young children, an important group for transmission of pneumococci to older age groups,<sup>2,3</sup> and is a precursor for disease.<sup>4</sup> There are over 90 known serotypes of pneumococci, with differing capacities for causing disease.<sup>5</sup>

The introduction of the pneumococcal conjugate vaccine (PCV) has resulted in substantial reductions in pneumococcal disease in many settings.<sup>6</sup> These reductions are mediated by direct effects on vaccinated children as well as indirect effects on under-vaccinated children and adults through a reduction in transmission and subsequent nasopharyngeal (NP) carriage of pneumococcal serotypes included in the vaccine.<sup>7-10</sup> The indirect effects account for a substantial component of the overall vaccine effect. Following the introduction of the 7-valent PCV (PCV7) into the routine vaccination program in the USA, twice as many invasive cases were prevented through indirect effects compared to direct effects.<sup>11</sup>

The magnitude of indirect effects following introduction of PCV varies considerably by setting. Reductions in invasive pneumococcal disease (IPD) among adults ranged from 8.8% among adults in Denmark three years after PCV implementation, to 70% reduction among adults in Taiwan, seven years after PCV implementation.<sup>12</sup> A review of the literature found that higher vaccine coverage, higher baseline rates of pneumococcal disease and greater time elapsed since PCV introduction were all associated with greater degrees of indirect effects.<sup>12</sup> However, the majority of these studies were conducted in high-income country settings using a similar vaccine schedule, with relatively high levels of vaccine coverage.

The threshold of vaccination coverage required to achieve significant indirect PCV effects on either pneumococcal carriage or disease outcomes are not well understood. Studies of NP carriage indicate that there is variability in the coverage required to achieve significant indirect effects. Two studies in the US examined this question for the 13-valent PCV (PCV13) that superseded 7-valent (PCV7) immunisation. A vaccine coverage of 58% among American Indian children in south-western USA and 75% coverage among children in Massachusetts resulted in a 50% decline in the prevalence of carriage of six PCV13 serotypes (i.e. PCV13 types not included in PCV7) carried by under-vaccinated children.<sup>13,14</sup> The US uses a 3+1 schedule (three primary doses with a booster) and had a catch-up program up to five years of age. Many low- and middle-income countries utilise a 3+0 schedule.<sup>15</sup> More data are needed from a range of low- and middle-income countries to determine the vaccination coverage required to achieve indirect protection from PCVs, and to determine factors which may modify the vaccine coverage required for indirect effects, such as baseline carriage prevalence, indicating intensity of transmission, vaccine schedules and use of catch-up campaigns.

Existing systematic reviews indicate that vaccine schedules do not impact on the degree of indirect effects on IPD, however the studies included in these reviews predominantly use a 3+1 schedule or a

1  
2  
3 2+1 schedule (two primary doses with a booster) and have limited studies using PCV13.<sup>12 16</sup> Few  
4 studies using the 3+0 schedule (three primary doses with no booster) are available in the published  
5 literature, despite the 3+0 schedule being widely used, especially in low- and middle-income  
6 countries. A recent study from Australia, the only high-income country to use the 3+0 schedule,  
7 concluded that the booster dose may be important for obtaining indirect protection because of the  
8 lower indirect effects observed compared to other high-income country settings.<sup>17</sup>  
9

10  
11 Despite the gradual introduction of PCVs in low- and middle-income countries over the last decade,  
12 there have been few studies published on the impacts of PCV in these settings.<sup>18 19</sup> This is because  
13 the predominant method for assessing vaccine impact, IPD surveillance, is costly and resource-  
14 intensive to establish – requiring laboratory capacity as well as the collection of large numbers of  
15 samples, obtained using aseptic techniques, in order to detect a relatively rare outcome.<sup>20</sup>  
16 Furthermore, baseline data prior to vaccine introduction required for impact evaluations are often not  
17 available in these settings.  
18

19  
20  
21 In the absence of IPD surveillance, low- and middle-income countries require a method to evaluate  
22 direct and indirect vaccine effects. We propose using NP carriage surveillance in children hospitalised  
23 with acute respiratory infection to monitor the indirect effects of PCV13 in the study called  
24 PneuCAPTIVE (PNEUmococcal CArriage in Pneumonia To Investigate Vaccine Effects).  
25

26  
27 In this context, we refer to “carriage” as the detection of pneumococci in the nasopharynx of a child  
28 with acute respiratory infection. A reduction in vaccine-type (VT) pneumococcal carriage  
29 suggests likely reductions in disease due to VT pneumococci, since carriage is a precursor to  
30 disease.<sup>4</sup> Existing studies among healthy children have demonstrated reductions in VT carriage  
31 following PCV introduction, while overall carriage remains stable due to replacement with non-vaccine  
32 type (NVT) carriage.<sup>21 22</sup>  
33

34  
35 We aim to determine the PCV13 coverage required to demonstrate substantial indirect effects of PCV  
36 using NP carriage surveillance in children hospitalised with acute respiratory infection (ARI) in three  
37 settings within the Asia-Pacific region. We are focussing on children under five years of age because  
38 studies have shown that children are the main reservoir for pneumococci, and reductions in  
39 transmission within this age group are likely to result in reductions in VT carriage among older age  
40 groups.<sup>23 23</sup>  
41

42  
43 As this is a novel method for determining indirect effects, we will also aim to determine whether  
44 changes in patterns of VT and NVT pneumococcal carriage among children with ARI are reflective of  
45 changes in serotypes circulating in the community, noting that carriage in our cohort may be more  
46 reflective of serotypes causing disease.<sup>5 24</sup>  
47  
48  
49

## 50 51 **OBJECTIVES**

52 Our objectives are to: (1) investigate the relationship between PCV13 coverage and VT carriage  
53 among under-vaccinated cases, defined as children (indirect effects) aged 2-59 months with an ARI in  
54 Lao People’s Democratic Republic (Lao PDR), Mongolia and Papua New Guinea (PNG); (2) describe  
55  
56  
57

1  
2  
3 monthly trends in VT carriage prevalence among cases and contacts. Contacts are defined as  
4 children 0-59 months of age, who have slept in the same house as or played with the case during the  
5 preceding three weeks; (3) investigate the relationship between PCV13 coverage and VT carriage  
6 among under-vaccinated contacts (indirect effects) and caregivers living in the community; and (4)  
7 compare the PCV13 coverage required to demonstrate indirect effects of PCV13 by site and  
8 determine the degree to which site-specific factors, such as pneumococcal carriage rates and  
9 densities, vaccine schedule and use of catch-up campaigns, account for differences in the PCV13  
10 coverage required to demonstrate indirect effects.  
11  
12  
13

## 14 **METHODS**

### 15 **Study design**

16 We are conducting prospective hospital-based observational studies in Lao PDR, Mongolia and PNG.  
17 We are recruiting children 2-59 months of age presenting with ARI and obtaining NP swabs to  
18 determine prevalence and density of VT carriage. We are determining the PCV13 status of each case  
19 using written record. Recruitment will occur over at least three years and up to five years post-PCV13  
20 introduction at each site.  
21  
22  
23

24 Concurrently, we are determining vaccination coverage at the resident village or subdistrict of each  
25 recruited case, using either administrative data or vaccination coverage surveys.  
26  
27

### 28 **Study settings**

#### 29 **Lao PDR site**

30 The Lao PDR PneuCAPTIVE study is embedded within a hospital-based study of ARI aetiology, in  
31 collaboration with Lao Oxford Mahosot Hospital-Wellcome Trust Research Unit (LOMWRU), the  
32 World Health Organization (WHO) and the Lao PDR Ministry of Health<sup>25</sup>. PCV13 was introduced in  
33 October 2013, using a 3+0 schedule at 6, 10 and 14 weeks of age and a catch-up program up to 12  
34 months of age (Table 1). We are recruiting cases at Mahosot Hospital, one of the largest paediatric  
35 referral hospitals in Vientiane, the capital of Lao PDR. Recruitment started in December 2013.  
36  
37  
38

#### 39 **Mongolia site**

40 The Mongolian PneuCAPTIVE study is embedded within a hospital-based paediatric pneumonia  
41 surveillance to determine vaccine impact which is conducted in partnership between Murdoch  
42 Children's Research Institute (MCRI), WHO and the Mongolian Ministry of Health. PCV13 was  
43 introduced in June 2016, using a modified 2+1 schedule at 2, 4 and 9 months of age, within the two  
44 'Phase 1' districts within Ulaanbaatar, the capital of Mongolia as part of a phased introduction (Table  
45 1), with a catch-up program of two doses one month apart for those up to 24 months of age. We are  
46 recruiting cases, residing in the two phase 1 districts, at the two district hospitals and the tertiary  
47 referral paediatric hospital for Mongolia, the Maternal and Child Hospital (MCH). Sampling started  
48 November 2015.  
49  
50  
51  
52

#### 53 **PNG site**

54 The PNG PneuCAPTIVE study represents a collaboration between the PNG Institute of Medical  
55 Research (IMR), Telethon Kids Institute, the University of Western Australia and MCRI. It is an  
56  
57  
58

extension of a pneumonia aetiology study that commenced in 2013<sup>26</sup>. PCV13 was introduced to PNG in October 2014 using a 3+0 schedule at 1, 2 and 3 months of age (Table 1), however was not widely distributed in the Eastern Highlands Province until late 2015. We are recruiting cases at the Eastern Highlands Provincial Hospital, the major referral hospital for the Eastern Highland Province, as well as nearby clinics in Goroka, the capital of the Eastern Highlands Province. Recruitment started April 2016. In PNG, we are also recruiting caregivers, as well as contacts, defined as children 0-59 months of age, who have slept in the same house as or played with the case during the preceding three weeks. This will enable us to determine whether changes in patterns of VT pneumococcal carriage in the hospitalised cases are reflective of changes within the community, as well as to examine indirect effects in the adult age group.

Table 1: Key aspects of the 13-valent pneumococcal conjugate vaccination (PCV13) program by site, Lao People's Democratic Republic (PDR), Mongolia and Papua New Guinea (PNG)

|                                | Lao PDR                                        | Mongolia                                                      | PNG                     |
|--------------------------------|------------------------------------------------|---------------------------------------------------------------|-------------------------|
| Year of PCV13 introduction     | Oct 2013                                       | Jun 2016                                                      | Oct 2014                |
| Location of PCV13 introduction | National                                       | Two districts in Ulaanbaatar                                  | National                |
| PCV13 schedule                 | 3+0 (6,10 and 14 weeks)                        | 2+1 (2,4, and 9 months)                                       | 3+0 (1, 2 and 3 months) |
| Presence of a catch-up program | Catch-up of three doses up to 12 months of age | Catch-up of two doses two months apart up to 24 months of age | None                    |

### Case recruitment and data collection

Participant recruitment and data collection are consistent across the three sites; however there are some local adaptations to the protocol at each site which are summarised in Table 2. These adaptations are due to the PneuCAPTIVE study being nested within other existing studies, described above.

Cases are eligible for inclusion in the PneuCAPTIVE study if they are 2-59 months of age, and presenting with ARI (defined in Table 2 below). All cases with fever or respiratory symptoms are screened for inclusion. In Mongolia, we are restricting recruitment to patients living within the two 'Phase 1' districts which have commenced PCV13 in 2016. In PNG, we are restricting recruitment to patients living within one hour of the town as follow-up is logistically challenging.

Regarding recruitment, in Lao PDR, study staff are screening potential recruits from Monday to Friday each week. However, they are obtaining clinical information from medical records for all eligible cases, including those admitted at weekends to ensure we have a representative sample. In Mongolia, caregivers of all eligible children presenting to the hospital will be approached for recruitment as part of the larger PCV impact study. However, for the purposes of this study we will

select a random sample of 33 cases per month for microbiological testing. In PNG recruitment takes place 4-5 days per week.

Table 2: Patient eligibility by site, Lao People's Democratic Republic (PDR), Mongolia and Papua New Guinea (PNG)

| Site                                             | Lao PDR                                                                                                                                                                                 | Mongolia                                                                                                                                                                                                                                                            | PNG                                                                                                                                                                  |
|--------------------------------------------------|-----------------------------------------------------------------------------------------------------------------------------------------------------------------------------------------|---------------------------------------------------------------------------------------------------------------------------------------------------------------------------------------------------------------------------------------------------------------------|----------------------------------------------------------------------------------------------------------------------------------------------------------------------|
| <b>Inclusion criteria</b>                        | 2-59 months of age and presenting with:                                                                                                                                                 |                                                                                                                                                                                                                                                                     |                                                                                                                                                                      |
| <b>Definition of acute respiratory infection</b> | Fever (parent report or measured) AND one of cough OR dyspnoea OR rhinitis OR abnormal chest auscultation                                                                               | Cough OR dyspnoea AND tachypnoea* OR hypoxia OR chest indrawing                                                                                                                                                                                                     | Cough AND tachypnoea* AND lower chest wall indrawing                                                                                                                 |
| <b>Exclusion criteria</b>                        | -                                                                                                                                                                                       | Lives outside Phase 1 district<br>Admitted with pneumonia in the last 14 days                                                                                                                                                                                       | Lives $\geq$ 1 hour outside town OR hospitalisation in past 14 days                                                                                                  |
| <b>Recruitment site</b>                          | Inpatient setting only                                                                                                                                                                  | Inpatient setting only                                                                                                                                                                                                                                              | Inpatient and outpatient setting                                                                                                                                     |
| <b>Sampling</b>                                  | Monday-Friday                                                                                                                                                                           | A random sample (33 per month) of all enrolled cases are selected for testing                                                                                                                                                                                       | Monday- Friday                                                                                                                                                       |
| <b>Sampling period</b>                           | December 2013- November 2019                                                                                                                                                            | November 2015 – October 2018 <sup>†</sup>                                                                                                                                                                                                                           | April 2016 – March 2019                                                                                                                                              |
| <b>Study population</b>                          | Mahosot Hospital is one of two tertiary-level paediatric hospitals in Vientiane and receives a mix of patients from urban Vientiane city, rural Vientiane province and other provinces. | The two secondary-level district hospitals and a tertiary-level Maternal and Child Health hospital service the vast majority of children in the two districts that received PCV. There are a limited number of paediatric beds at private hospitals in Ulaanbaatar. | The Eastern Highlands Provincial hospital is the sole hospital for the province. Study population includes urban and rural households within 1 hour drive of Goroka. |

\* Tachypnoea is defined as greater than or equal to 50 breaths per minute

<sup>†</sup> A one-year extension (until June 2019) has been sought for the Mongolian site

1  
2  
3 After determining eligibility and obtaining informed parental consent, we complete a questionnaire to  
4 obtain: demographic data, clinical data, PCV13 status, and risk factors for vaccination and NP  
5 carriage, including prior antibiotic use (see analysis section below for complete list). Vaccination  
6 status is determined using written records – either parent-held immunisation records or health centre  
7 administrative records.  
8  
9

10 We then collect an NP swab according to WHO guidelines and store it in 1 ml skim milk tryptone  
11 glucose glycerol (STGG) medium.<sup>27</sup> Swabs are vortexed, aliquoted, and stored frozen at -80°C within  
12 8 hours of collection, and transported from all three sites to the Pneumococcal Research laboratory at  
13 MCRI on dry ice or in liquid nitrogen, where they will be stored at -80°C.  
14  
15

### 16 **Laboratory methods**

17 All samples are screened for the presence of pneumococci using real-time quantitative PCR (qPCR)  
18 assay targeting the pneumococcal *lytA* gene.<sup>28</sup> Genomic DNA are extracted from 100 µl of STGG  
19 using a MagNA Pure LC Machine (Roche) using the DNA Isolation Kit III (Bacteria, Fungi) (Roche)  
20 following an enzymatic lysis treatment. The pneumococcal load is estimated by reference to a  
21 standard curve.  
22  
23

24 All swabs that are *lytA* positive or equivocal are molecular serotyped using BµG@S Senti-SP v1.5  
25 microarray (BUGS Bioscience) as previously described.<sup>29</sup>  
26  
27

28 Serotype-specific pneumococcal density is calculated using the relative abundance of each serotype  
29 identified, as determined using microarray and interpreted with the assistance of a Bayesian random  
30 effects model as previously described,<sup>29 30</sup> and the overall pneumococcal load as determined by the  
31 *lytA* qPCR.  
32  
33

### 34 **Key definitions**

35 The primary outcome, VT carriage, is defined as the NP carriage of at least one pneumococcal  
36 serotype included in the PCV13 vaccine, i.e. serotypes 1, 3, 4, 5, 6A, 6B, 7F, 9V, 14, 18C, 19A, 19F,  
37 and 23F. In the context of multiple serotype carriage, VT carriage will be defined as the presence of at  
38 least one VT serotype regardless of the presence of other serotypes. A secondary outcome is VT  
39 carriage density (CFU/mL) which is defined as an aggregate of the serotype-specific density for each  
40 of the VTs carried by the case, and will be reported as a continuous variable using a log scale to  
41 account for large variations in density and a skewed distribution.  
42  
43  
44

45 Vaccine history will be defined based on documented evidence of receiving an adequate number of  
46 PCV doses to provide a protective immune response against vaccine serotypes at least 14 days prior  
47 to study enrolment.<sup>31</sup> For children < 12 months of age, 'vaccinated' is defined as two or more PCV13  
48 doses. For children 12 months of age or older, 'vaccinated' is defined as receipt of 2 doses in the first  
49 year of life or at least 1 dose after the age of 12 months. Conversely, a case will be defined as 'under-  
50 vaccinated' if they have received less than the adequate number of PCV doses (including those never  
51 vaccinated). Sensitivity analyses will be conducted using varying definitions of vaccinated including  
52 receiving at least one dose of vaccine at any age.  
53  
54  
55  
56  
57  
58  
59  
60

### Vaccine coverage data collection

For each under-vaccinated case recruited (including those with and without VT pneumococci), we are determining their resident village or subdistrict vaccination coverage. In Mongolia and Lao PDR, we are using administrative data. The resident village or subdistrict is identified using relevant administrative codes, which are determined by local staff on enrolment. This determines the health centre's administrative boundary for the provision of immunisation services, whereas in PNG, we are conducting community surveys within 10 days of discharge in the village where the case is living (Table 3). We are surveying all children less than five years of age, from households within 10-20 minutes' walk of the case, since this is the group of children with whom the case is mostly likely to interact and therefore influence their carriage status.

To determine the reliability of our methods in Lao PDR, we plan on comparing our coverage estimates with a National Immunisation Survey, conducted according to WHO guidelines in 2015, when provincial level estimates from this survey become available. In Mongolia, we have validated the newly introduced electronic immunisation record against clinic health records, finding a high degree of concordance.<sup>32</sup> We are also in the process of validating the population registers at health centres in Mongolia.

Table 3: Vaccination coverage data by site, Lao People's Democratic Republic (PDR), Mongolia and Papua New Guinea

| Site                       | Lao PDR                                    | Mongolia                           | Papua New Guinea  |
|----------------------------|--------------------------------------------|------------------------------------|-------------------|
| Source of numerator data   | Health centre records                      | Electronic immunisation record     | Community surveys |
| Source of denominator data | Lao PDR Population and Housing Census 2015 | Health centre population register* |                   |

\* All children are required to be registered at the health centre servicing their resident subdistrict in order to receive health services.

### Data management

In Lao PDR and Mongolia, study staff are double-entering data using a RedCAP (Research Electronic Data Capture) and Microsoft Access (Microsoft Corporation) database, respectively. In PNG, data are checked by a monitor prior to being entered into Filemaker Pro (FileMaker Inc.). We are conducting regular double-entry discrepancy checks and logic checks using Stata Statistical Software (College Station, TX: StataCorp LLC).

### Analysis

All analyses will be completed using Stata Statistical Software (College Station, TX: StataCorp LLC). We will summarise continuous variables using mean and standard deviation (or median and interquartile range for non-symmetrical data). Categorical variables will be summarised using frequency counts and percentages.

1  
2  
3 Objective 1: Relationship between vaccine coverage and indirect effects

4 We want to investigate the relationship between VT carriage and density among under-vaccinated  
5 cases (indirect effects) and subdistrict/village PCV coverage. We will use an adaptation of a method  
6 used to estimate indirect protection for an oral cholera vaccine which exploits heterogeneities in  
7 vaccine coverage at the subdistrict/village level, comparing VT carriage and density among under-  
8 vaccinated children from subdistricts/villages with differing levels of vaccine coverage.<sup>33 34</sup>  
9  
10

11 This will be done using multivariable models with VT carriage or density in ARI cases as the outcome  
12 variable and PCV coverage at the child's place of residence at the time of admission as the exposure  
13 variable. We will use generalised estimating equations to account for clustering at the  
14 subdistrict/village level.  
15  
16

17 To identify confounders for adjustment, we will construct directed acyclic graphs (DAG). DAGs  
18 include all variables potentially related to exposure and outcome, connected using uni-directional  
19 arrows showing causal relationships between variables. The graph identifies potentially confounding  
20 pathways and allows investigators to determine variables that should be controlled for to obtain  
21 unbiased effect estimates. As there are likely to be unique confounders between sites, we will develop  
22 site-specific DAGs. We will use DAGitty.net (version 2.3) software to identify minimally sufficient  
23 confounding subsets for adjustment.  
24  
25  
26

27 For each site, we will construct a similar model using overall pneumococcal carriage as the  
28 dependent variable. This model will act as a bias indicator since PCV coverage is not expected to  
29 affect levels of overall pneumococcal carriage due to replacement carriage with NVTs, although  
30 complete replacement to baseline levels can take several years.<sup>21 35 36</sup> Therefore, we will restrict this  
31 analysis to the latter part of the study period, when descriptive analyses indicate the replacement is  
32 complete.  
33  
34  
35

36 To determine whether a higher PCV coverage is required to achieve indirect effects among  
37 completely un-vaccinated cases compared to under-vaccinated cases, we will conduct a sensitivity  
38 analysis among children who have never received PCV.  
39  
40

41 Objective 2: VT carriage prevalence among cases and contacts, by calendar month (PNG only)  
42 Crude and adjusted monthly VT carriage prevalence will be estimated within rolling seven-month  
43 intervals to present smooth curves and assess trends over time. This will be done separately for  
44 cases and contacts. To account for differences in age between cases and community contacts, the  
45 carriage prevalence will be adjusted using direct standardisation (standardised to the case population  
46 over the entire study period).  
47  
48

49 Objective 3: Relationship between vaccine coverage and indirect effects among community contacts  
50 (PNG only)  
51

52 To investigate whether relationship between vaccine coverage and indirect effects as observed  
53 among cases with ARI are reflective of the relationship between vaccine coverage and indirect effects  
54 in the wider community, we will apply the same model described above to under-vaccinated  
55 community contacts. We will construct multivariable models with VT carriage and density among  
56  
57  
58



1  
2  
3 under-vaccinated community contacts as the outcome variable and PCV coverage at the child's place  
4 of residence at the time of admission as the exposure variable. We will be using the same vaccine  
5 coverage data as for the cases.  
6

7 **Objective 4: Comparison of vaccine coverage required for indirect effects across sites**

8 We will compare differences in the PCV13 coverage required to demonstrate indirect effects of  
9 PCV13 qualitatively, by site and in relation to vaccine schedule and use of catch-up campaigns.  
10 Inferential statistics are unlikely to be suitable with the inclusion of only three sites and comparability  
11 between sites is limited due to variations between them.  
12  
13

#### 14 **Power calculation**

15 Power calculations were performed using nQuery Advisor + nTerim 4.0. Calculations were based on  
16 sample size methods for logistic regression models with a continuous covariate (i.e. PCV coverage)  
17 and additional covariates, with inflation to account for clustering within villages. Power calculations  
18 assumed VT carriage prevalence of 30% in Lao PDR and 40% in Mongolia and PNG at the mean  
19 PCV coverage level,<sup>37</sup> and VT carriage prevalence of 20% in Lao PDR and 30% in Mongolia and  
20 PNG at one standard deviation above the mean PCV coverage level. Assuming a significance level of  
21 0.05, allowing for adjustment using multiple covariates with an r-squared of 0.4, and that 50% of the  
22 cases are under-vaccinated, a sample size of 1200 cases per site would provide between 87% and  
23 92% power to determine the proportion of cases carrying VT pneumococcus at varying levels of  
24 village vaccine coverage. The power calculation has been adjusted to account for clustering by  
25 village, with higher variability in Lao PDR and PNG (intraclass coefficient [ICC] 0.1) and lower  
26 variability in Mongolia (ICC 0.01).  
27  
28  
29  
30  
31  
32

#### 33 **Missing data**

34 We will describe the number of participants with missing data on individual variables and compare the  
35 characteristics of those with and without missing data to determine whether there is evidence of  
36 systematic differences in characteristics. If we determine that the differences observed are able to be  
37 explained by available data (i.e. missing at random), we will consider using multiple imputation to  
38 predict the distribution of the missing data in order to account for the bias due to incomplete data.<sup>38</sup>  
39  
40  
41

#### 42 **Patient and Public Involvement**

43 Patients were not involved in the design of this study. Public health authorities in Laos and Mongolia  
44 were involved in the design and conduct of the study. In PNG, village representatives are approached  
45 to ensure that community surveys are conducted appropriately.  
46  
47

#### 48 **CURRENT STATUS OF THE STUDY**

49 Recruitment is ongoing and analysis of data, followed by publication of results, is expected from 2018  
50 onwards. As of August 2017, we have recruited 1039, 481 and 3847 cases from Lao PDR, PNG and  
51 Mongolia respectively. Table 4 describes the baseline characteristics of the children recruited.  
52  
53  
54  
55  
56  
57  
58  
59  
60

Table 4: Case characteristics by site, Lao People's Democratic Republic (PDR), Mongolia and Papua New Guinea (PNG), 2014-2017

|                     |              | Lao PDR<br>n=1039<br>n (%) | Mongolia<br>n=3847<br>n (%) | PNG<br>n=481<br>n (%) |
|---------------------|--------------|----------------------------|-----------------------------|-----------------------|
| Year of recruitment | 2014         | 365/1039 (35)              | NA                          | NA                    |
|                     | 2015         | 323/1039 (31)              | 885/3847 (23)               | NA                    |
|                     | 2016         | 281/1039 (27)              | 2007/3847 (52)              | 190/481 (40)          |
|                     | 2017         | 70/1039 (7)                | 955/3847 (25)               | 291/481 (60)          |
| Age group           | < 12 months  | 432/1038 (42)              | 1481/3847 (39)              | 258/481 (54)          |
|                     | 12-23 months | 346/1038 (33)              | 1250/3847 (32)              | 123/481 (25)          |
|                     | >=24 months  | 260/1038 (25)              | 1116/3847 (29)              | 100/481 (21)          |
| Gender              | Male         | 591/1039 (57)              | 2079/3847 (54)              | 278/481 (58)          |

### ETHICS AND DISSEMINATION

Prospective participants will be fully informed about the potential risks and benefits of participation and written informed consent will be obtained prior to recruitment. The study is being conducted according to protocols approved by the following ethics committees: Lao PDR Ministry of Health National Ethics Committee for Health Research (057/2013 NECHR), Oxford Tropical Research Ethics Committee (1050-13), Mongolian National Ethics Committee for Health Research, the WHO Regional Office for the Western Pacific (WPRO) Ethics Review Committee (2013.30.LAO.2.EPI), PNG IMR Institutional Review Board (1510), Government of PNG Medical Research Advisory Committee (15.18), and the Royal Children's Hospital/MCRI Human Research Ethics Committee (33177B, 33203E).

We plan on disseminating results to relevant stakeholders within Lao PDR, PNG and Mongolia, as well as submitting our findings for publication in relevant peer-reviewed journals and conferences.

### DISCUSSION

The ability for low- and middle-income countries to monitor the indirect effects of PCV is critical. Maximising indirect effects is important because these effects comprise a substantial proportion of overall PCV impact and increase the cost-effectiveness of the vaccine.<sup>39</sup> Indirect protection is particularly important for individuals who are unable to be vaccinated or who have poor vaccine responses, such as infants too young to be vaccinated and the elderly. In addition, the Bill & Melinda Gates Foundation are supporting studies looking into the effectiveness of reduced dose schedules (1+1). This reduced dose schedule needs to maintain indirect effects following PCV introduction and this surveillance method provides a mechanism to determine when herd protection has been

1  
2  
3 achieved and whether it is maintained.<sup>40</sup> Furthermore, the ability to determine whether substantial  
4 herd immunity has been achieved may help to identify settings which are appropriate for introduction  
5 of reduced dose or modified schedules.  
6

7 The results of our study will address the scarcity of literature determining the PCV coverage required  
8 to achieve substantial indirect effects, especially in low- and middle-income countries. The inclusion of  
9 three sites, which have contrasting vaccine schedules, baseline intensities of pneumococcal carriage  
10 and health-care systems, will also enable us to determine whether this vaccine coverage threshold  
11 differs by site and explore factors which may modify the vaccine coverage required to achieve indirect  
12 effects.  
13  
14  
15

16 In this proposal, we describe a novel application of an analysis method to measure indirect effects.  
17 Although the isolation of a particular pneumococcal serotype from the nasopharynx of a child with ARI  
18 is not necessarily indicative of the serotype causing pneumococcal disease, reduced detection of VT  
19 pneumococci is likely to reflect reductions in disease due to VT pneumococci. Furthermore, our  
20 proposed analysis methods enable estimation of indirect effects in the absence of baseline pre-PCV  
21 data. This will be relevant for many low- and middle-income countries that have little or no baseline  
22 data and are considering options for surveillance to accompany the introduction of PCV.  
23  
24  
25

26 Another key strength of our methods is the use of consistent molecular serotyping microarray  
27 methods across all three sites, enabling sensitive detection of multiple serotype carriage and  
28 ascertainment of serotype-specific density.<sup>29</sup> Conventional pneumococcal carriage studies typically  
29 detect the presence of a single serotype and may overlook the presence of vaccine serotypes  
30 occurring at lower densities. The results of this study will also add to the limited literature on the  
31 effects of PCV on vaccine-type carriage density, which may affect likelihood of transmission.<sup>41</sup>  
32  
33  
34

35 Our proposed methods have several potential limitations. Firstly, there are significant challenges in  
36 determining accurate estimates of PCV coverage in resource-limited settings. In Mongolia and Lao  
37 PDR, where we are using administrative data, our estimates rely on the availability of accurate data  
38 about vaccine doses administered (numerator) as well as population estimates for the target age  
39 group (denominator). In both settings, we are conducting audits to assess the reliability of numerator  
40 data. Regarding denominator data, we are fortunate that a recent population census was conducted  
41 in Lao PDR in March 2015. However, we will be auditing denominator data in Mongolia, where  
42 population estimates are affected by large seasonal population movements between rural and urban  
43 settings. In PNG, the validity of the community surveys depends on representative sampling. However  
44 survey participation can vary and is affected by season (related to farming practices), as well as  
45 community trust and understanding of the study. To maximise participation, we conducted mobile  
46 health clinics alongside the community surveys.  
47  
48  
49  
50

51 The second main limitation relates to detecting pneumococcal carriage in our study population of  
52 children hospitalised with respiratory infection. In this population, carriage detection may be affected  
53 by the prior use of antibiotics.<sup>42 43</sup> To address this, we have, where possible, aimed to recruit patients  
54  
55  
56  
57  
58  
59  
60

1  
2  
3 at admission, prior to receiving antibiotics or documented prior antibiotic use, which will be taken into  
4 account during analysis.  
5

6 Thirdly, there are variations in methods and setting across the three sites. This limitation may impact  
7 on the comparability of our results across the three sites. The reason for the differences in methods  
8 between sites is that our study is built on pre-existing studies (pneumonia aetiology studies in Lao  
9 PDR and PNG, and a vaccine impact study in Mongolia) with established protocols.  
10

11  
12 To conclude, the results of this study will provide important feedback to national policy makers about  
13 the effects of newly introduced PCV programs in Lao PDR, Mongolia, and PNG. The results will help  
14 us understand the determinants of indirect effects and therefore guide strategies to maximise them. In  
15 particular, the results will also inform global policy about the vaccine coverage required to achieve  
16 substantial indirect effects in settings with different epidemiological characteristics of pneumococcal  
17 disease and carriage and will maximise the cost-effectiveness of the vaccine programs.  
18  
19

#### 20 21 **Acknowledgements:**

22 We would like to acknowledge the Ministries of Health of Lao PDR and Mongolia, LOMWRU, PNG  
23 IMR and WHO and support from the Victorian Government's Operational Infrastructure Support  
24 Program. We would also like to thank study staff, laboratory staff and participating families.  
25  
26

27 The PneuCAPTIVE protocol development group includes the authors of the paper listed in the by-line  
28 and the following: Dashtseren Luvsantseren (NCCD, Ulaanbaatar, Mongolia), Bujinlkham (NCCD,  
29 Ulaanbaatar, Mongolia), Mukhchuluun Ulziibayar (NCCD, Ulaanbaatar, Mongolia), Dashpagam  
30 (NCCD, Ulaanbaatar, Mongolia), Audrey Dubot-Pérès (LOMHWRU, Vientiane, Lao PDR),  
31 Keodomphone Vilavong (LOMHWRU, Vientiane, Lao PDR), Anisone Chanthongthip (LOMHWRU,  
32 Vientiane, Lao PDR), Syladeth Chanthaphone (LOMHWRU, Vientiane, Lao PDR), Joycelyn Sapura  
33 (PNG IMR, Goroka, PNG), John Kave (PNG IMR, Goroka, PNG), Tonny Kumani (PNG IMR, Goroka,  
34 PNG), Wendy Kirarock (PNG IMR, Goroka, PNG).  
35  
36  
37  
38

39 **Author's contributions:** FR conceived the idea and designed the study. JL, SD, KF, PN, RL, RP,  
40 AX, DD and FR supported the development of country-specific protocols and study implementation in  
41 Lao PDR. CCB, RF, DL, WP and FR supported the development of country-specific protocols and  
42 study implementation in PNG. TM, SLV, CVM, KM, JC and FR supported the development of  
43 country-specific protocols and study implementation in Mongolia. CS, ED and JH devised the  
44 microbiological approach and laboratory protocols. JC, CN, RA, and FR devised the analysis plan. JC  
45 and FR drafted the manuscript. All authors provided feedback to the draft manuscript and have read  
46 and approved the final version.  
47  
48  
49

50 **Funding statement:** This work is supported by the Bill & Melinda Gates Foundation grant number  
51 (OPP1115490). JC is completing a PhD at The University of Melbourne, funded by an Australian  
52 Government Research Training Program scholarship.  
53  
54

55 **Competing interests:** None declared.  
56  
57  
58  
59  
60

## REFERENCES

1. Wang H, Bhutta ZA, Coates MM, et al. Global, regional, national, and selected subnational levels of stillbirths, neonatal, infant, and under-5 mortality 1980-2015: a systematic analysis for the Global Burden of Disease Study 2015. *The Lancet* 2016;388(10053):1725-74. doi: 10.1016/S0140-6736(16)31575-6
2. Hill PC, Townend J, Antonio M, et al. Transmission of *Streptococcus pneumoniae* in rural Gambian villages: a longitudinal study. *Clinical Infectious Diseases* 2010;50(11):1468-76. doi: <http://dx.doi.org/10.1086/652443>
3. Hussain M, Melegaro A, Pebody RG, et al. A longitudinal household study of *Streptococcus pneumoniae* nasopharyngeal carriage in a UK setting. *Epidemiology and Infection* 2005;133(5):891-98. doi: <http://dx.doi.org/10.1017/S0950268805004012>
4. Gray BM, Converse GM, 3rd, Dillon HC, Jr. Epidemiologic studies of *Streptococcus pneumoniae* in infants: acquisition, carriage, and infection during the first 24 months of life. *The Journal of infectious diseases* 1980;142(6):923-33. [published Online First: 1980/12/01]
5. Varon E, Cohen R, Bechet S, et al. Invasive disease potential of pneumococci before and after the 13-valent pneumococcal conjugate vaccine implementation in children. *Vaccine* 2015;33(46):6178-85.
6. Johnson HL, Deloria-Knoll M, Levine OS, et al. Systematic evaluation of serotypes causing invasive pneumococcal disease among children under five: the pneumococcal global serotype project. *PLoS Med* 2010;7(10) doi: 10.1371/journal.pmed.1000348 [published Online First: 2010/10/20]
7. Loo JD, Conklin L, Fleming-Dutra KE, et al. Systematic review of the effect of pneumococcal conjugate vaccine dosing schedules on prevention of pneumonia. *The Pediatric infectious disease journal* 2014;33 Suppl 2:S140-51. doi: 10.1097/inf.0000000000000082 [published Online First: 2013/12/18]
8. Conklin L, Loo JD, Kirk J, et al. Systematic review of the effect of pneumococcal conjugate vaccine dosing schedules on vaccine-type invasive pneumococcal disease among young children. *The Pediatric infectious disease journal* 2014;33 Suppl 2:S109-18. doi: 10.1097/inf.0000000000000078 [published Online First: 2013/12/18]
9. Le Saux N. Pneumococcal conjugate vaccines for preventing otitis media. *Paediatrics & Child Health* 2016;21(2):89-90.
10. Loo JD, Conklin L, Fleming-Dutra KE, et al. Systematic review of the indirect effect of pneumococcal conjugate vaccine dosing schedules on pneumococcal disease and colonization. *Pediatric Infectious Disease Journal* 2014;33 Suppl 2:S161-71.
11. Direct and indirect effects of routine vaccination of children with 7-valent pneumococcal conjugate vaccine on incidence of invasive pneumococcal disease--United States, 1998-2003. *MMWR Morbidity and mortality weekly report* 2005;54(36):893-7. [published Online First: 2005/09/16]
12. Tsaban G, Ben-Shimol S. Indirect (herd) protection, following pneumococcal conjugated vaccines introduction: A systematic review of the literature. *Vaccine* 2017;35(22):2882-91. doi: 10.1016/j.vaccine.2017.04.032 [published Online First: 2017/04/30]
13. Loughlin AM, Hsu K, Silverio AL, et al. Direct and indirect effects of PCV13 on nasopharyngeal carriage of PCV13 unique pneumococcal serotypes in Massachusetts' children. *The Pediatric infectious disease journal* 2014;33(5):504-10. doi: 10.1097/inf.0000000000000279 [published Online First: 2014/03/29]
14. Grant LR, Hammitt LL, O'Brien SE, et al. Impact of the 13-valent pneumococcal conjugate vaccine on pneumococcal carriage among American Indians. *The Pediatric infectious disease journal* 2016;35(8):907-14. doi: 10.1097/inf.0000000000001207 [published Online First: 2016/05/14]

- 1  
2  
3 15. International Vaccine Access Center - John Hopkins Bloomberg School of Public Health. VIEW-  
4 hub 2016 [accessed 17/12/2016].
- 5  
6 16. Shiri T, Datta S, Madan J, et al. Indirect effects of childhood pneumococcal conjugate vaccination  
7 on invasive pneumococcal disease: a systematic review and meta-analysis. *The Lancet Global Health*  
8 2017;5(1):e51-e59. doi: 10.1016/s2214-109x(16)30306-0
- 9  
10 17. Jayasinghe S, Menzies R, Chiu C, et al. Long-term impact of a “3+0” schedule for 7 and 13 valent  
11 pneumococcal conjugate vaccines on invasive pneumococcal disease in Australia, 2002-2014.  
12 *Clinical Infectious Diseases* 2016 doi: 10.1093/cid/ciw720
- 13  
14 18. Mackenzie GA, Hill PC, Jeffries DJ, et al. Effect of the introduction of pneumococcal conjugate  
15 vaccination on invasive pneumococcal disease in The Gambia: a population-based surveillance  
16 study. *The Lancet Infectious diseases* 2016;16(6):703-11. doi: 10.1016/s1473-3099(16)00054-2  
17 [published Online First: 2016/02/22]
- 18  
19 19. von Gottberg A, de Gouveia L, Tempia S, et al. Effects of vaccination on invasive pneumococcal  
20 disease in South Africa. *The New England journal of medicine* 2014;371(20):1889-99. doi:  
21 10.1056/NEJMoa1401914 [published Online First: 2014/11/12]
- 22  
23 20. Rodgers GL, Klugman KP. Surveillance of the impact of pneumococcal conjugate vaccines in  
24 developing countries. *Human Vaccines and Immunotherapeutics* 2016;12(2):417-20. doi:  
25 <http://dx.doi.org/10.1080/21645515.2015.1057671>
- 26  
27 21. Gladstone RA, Jefferies JM, Tocheva AS, et al. Five winters of pneumococcal serotype  
28 replacement in UK carriage following PCV introduction. *Vaccine* 2015;33(17):2015-21.
- 29  
30 22. Dunne EM, Manning J, Russell FM, et al. Effect of pneumococcal vaccination on nasopharyngeal  
31 carriage of *Streptococcus pneumoniae*, *Haemophilus influenzae*, *Moraxella catarrhalis*, and  
32 *Staphylococcus aureus* in Fijian children. *J Clin Microbiol* 2012;50(3):1034-8. doi: 10.1128/jcm.06589-  
33 11 [published Online First: 2011/12/16]
- 34  
35 23. Mosser JF, Grant LR, Millar EV, et al. Nasopharyngeal carriage and transmission of  
36 *Streptococcus pneumoniae* in American Indian households after a decade of pneumococcal  
37 conjugate vaccine use. [Erratum appears in PLoS One. 2014;9(3):e93878]. *PLoS ONE [Electronic*  
38 *Resource]* 2014;9(1):e79578.
- 39  
40 24. Lehmann D, Gratten M, Montgomery J. Susceptibility of pneumococcal carriage isolates to  
41 penicillin provides a conservative estimate of susceptibility of invasive pneumococci. *The Pediatric*  
42 *infectious disease journal* 1997;16(3):297-305. [published Online First: 1997/03/01]
- 43  
44 25. Nguyen VH, Dubot-Peres A, Russell FM, et al. Acute respiratory infections in hospitalized children  
45 in Vientiane, Lao PDR - the importance of Respiratory Syncytial Virus. *Scientific reports*  
46 2017;7(1):9318. doi: 10.1038/s41598-017-09006-6 [published Online First: 2017/08/26]
- 47  
48 26. Blyth CC, Ford R, Sapura J, et al. Childhood pneumonia and meningitis in the Eastern Highlands  
49 Province, Papua New Guinea in the era of conjugate vaccines: study methods and challenges.  
50 *Pneumonia (Nathan Qld)* 2017;9:5. doi: 10.1186/s41479-017-0029-y [published Online First:  
51 2017/07/14]
- 52  
53 27. Satzke C, Turner P, Virolainen-Julkunen A, et al. Standard method for detecting upper respiratory  
54 carriage of *Streptococcus pneumoniae*: updated recommendations from the World Health  
55 Organization Pneumococcal Carriage Working Group. *Vaccine* 2013;32(1):165-79. doi:  
56 10.1016/j.vaccine.2013.08.062 [published Online First: 2013/12/18]
- 57  
58 28. Dunne EM, Manning J, Russell FM, et al. Effect of Pneumococcal Vaccination on Nasopharyngeal  
59 Carriage of *Streptococcus pneumoniae*, *Haemophilus influenzae*, *Moraxella catarrhalis*, and  
60 *Staphylococcus aureus* in Fijian Children. *Journal of Clinical Microbiology* 2012;50(3):1034-38. doi:  
10.1128/JCM.06589-11

- 1  
2  
3 29. Satzke C, Dunne EM, Porter BD, et al. The PneuCarriage Project: A Multi-Centre Comparative  
4 Study to Identify the Best Serotyping Methods for Examining Pneumococcal Carriage in Vaccine  
5 Evaluation Studies. *PLoS Medicine / Public Library of Science* 2015;12(11):e1001903; discussion  
6 e03.
- 7 30. Newton R, Hinds J, Wernisch L. Empirical Bayesian models for analysing molecular serotyping  
8 microarrays. *BMC bioinformatics* 2011;12:88. doi: 10.1186/1471-2105-12-88 [published Online First:  
9 2011/04/02]
- 10 31. Scott P, Rutjes AW, Bermetz L, et al. Comparing pneumococcal conjugate vaccine schedules  
11 based on 3 and 2 primary doses: systematic review and meta-analysis. *Vaccine* 2011;29(52):9711-  
12 21. doi: 10.1016/j.vaccine.2011.07.042 [published Online First: 2011/08/09]
- 13 32. Chan J. High agreement between the new Mongolian electronic immunisation register and clinic  
14 immunisation records: a health centre based audit. *Western Pacific Surveillance and Response*  
15 *Journal* 2017;In press
- 16 33. Deen J, Ali M, Sack D. Methods to assess the impact of mass oral cholera vaccination campaigns  
17 under real field conditions. *PLoS ONE* 2014;9(2):e88139. doi: 10.1371/journal.pone.0088139
- 18 34. Khatib AM, Ali M, von Seidlein L, et al. Effectiveness of an oral cholera vaccine in Zanzibar:  
19 findings from a mass vaccination campaign and observational cohort study. *The Lancet Infectious*  
20 *diseases* 2012;12(11):837-44. doi: 10.1016/s1473-3099(12)70196-2 [published Online First:  
21 2012/09/08]
- 22 35. Moore MR, Hyde TB, Hennessy TW, et al. Impact of a conjugate vaccine on community-wide  
23 carriage of nonsusceptible *Streptococcus pneumoniae* in Alaska. *Journal of Infectious Diseases*  
24 2004;190(11):2031-8.
- 25 36. Usuf E, Bottomley C, Adegbola RA, et al. Pneumococcal carriage in sub-Saharan Africa - A  
26 systematic review. *PLoS ONE* 2014;9 (1) (no pagination)(e85001) doi:  
27 <http://dx.doi.org/10.1371/journal.pone.0085001>
- 28 37. Aho C, Michael A, Yoannes M, et al. Limited impact of neonatal or early infant schedules of 7-  
29 valent pneumococcal conjugate vaccination on nasopharyngeal carriage of *Streptococcus*  
30 *pneumoniae* in Papua New Guinean children: A randomized controlled trial. *Vaccine Reports*  
31 2016;6:36-43. doi: <http://dx.doi.org/10.1016/j.vacrep.2016.08.002>
- 32 38. Sterne JAC, White IR, Carlin JB, et al. Multiple imputation for missing data in epidemiological and  
33 clinical research: potential and pitfalls. *Bmj* 2009;338 doi: 10.1136/bmj.b2393
- 34 39. Isaacman DJ, Strutton DR, Kalpas EA, et al. The impact of indirect (herd) protection on the cost-  
35 effectiveness of pneumococcal conjugate vaccine. *Clinical therapeutics* 2008;30(2):341-57. doi:  
36 10.1016/j.clinthera.2008.02.003 [published Online First: 2008/03/18]
- 37 40. Rodgers GL, Klugman KP. A new paradigm in pneumococcal conjugate vaccination: moving from  
38 individual to herd protection. *International journal of infectious diseases : IJID : official publication of*  
39 *the International Society for Infectious Diseases* 2017 doi: 10.1016/j.ijid.2017.04.015
- 40 41. Roca A, Bottomley C, Hill PC, et al. Effect of age and vaccination with a pneumococcal conjugate  
41 vaccine on the density of pneumococcal nasopharyngeal carriage. *Clinical Infectious Diseases*  
42 2012;55(6):816-24.
- 43 42. Abdullahi O, Karani A, Tigoi CC, et al. The prevalence and risk factors for pneumococcal  
44 colonization of the nasopharynx among children in Kilifi District, Kenya. *PLoS One* 2012;7(2):e30787.  
45 doi: 10.1371/journal.pone.0030787 [published Online First: 2012/03/01]
- 46 43. Alpkvist H, Athlin S, Naucner P, et al. Clinical and Microbiological Factors Associated with High  
47 Nasopharyngeal Pneumococcal Density in Patients with Pneumococcal Pneumonia. *PLoS One*  
48 2015;10(10):e0140112. doi: 10.1371/journal.pone.0140112 [published Online First: 2015/10/16]

1  
2  
3  
4  
5  
6  
7  
8  
9  
10  
11  
12  
13  
14  
15  
16  
17  
18  
19  
20  
21  
22  
23  
24  
25  
26  
27  
28  
29  
30  
31  
32  
33  
34  
35  
36  
37  
38  
39  
40  
41  
42  
43  
44  
45  
46  
47  
48  
49  
50  
51  
52  
53  
54  
55  
56  
57  
58  
59  
60

For peer review only
